# Supplementary material for: Western diet induces iron-dependent enteric neurodegeneration via ferroptosis
Source: JCI journal article supplement (doi:10.1172/jci196113), 2026-04-21
Supplement: sd1 [file 1]

1  
2  
3  
4  
5  
6  
7  
8  
9  
10  
11  
12  
13  
14  
15  
16  
17  
18  
19  
20  
21  
22  
23  
24  
25  
26  
27  
28  
29  
30  
31  
32  
33  
34

**Supplemental Information**

**Western Diet Induces Iron-Dependent Enteric Neurodegeneration via Ferroptosis:  
Mechanistic Insights from Murine and Human Models**

Arun Balasubramaniam<sup>1,2†</sup>, Dmitrii Pavlov<sup>4†</sup>, Yunpeng Du<sup>4</sup>, Jeremy Reeves<sup>4</sup>, Alan Harzman<sup>5</sup>,  
Yunshan Liu<sup>1,2</sup>, Francesca Cingolani<sup>1,2</sup>, Xinxu Yuan<sup>6</sup>, Jay M. Patel<sup>2,7</sup>, Simon Musyoka Mwangi<sup>1,2</sup>,  
Peijian He<sup>1</sup>, C. Michael Hart<sup>2,3</sup>, Wenhui Hu<sup>6</sup>, Fievos Christofi<sup>4</sup>, Shanthi Srinivasan<sup>1,2\*</sup>

<sup>1</sup>Division of Digestive Diseases, Emory University School of Medicine, Atlanta, GA, USA. <sup>2</sup>Atlanta VA Health Care System, Atlanta, GA, USA.

<sup>3</sup>Division of Pulmonary, Allergy, Critical Care and Sleep Medicine, Emory University School of Medicine, Atlanta, GA, USA.

<sup>4</sup>Department of Anesthesiology, The Ohio State University, Columbus, OH, USA.

<sup>5</sup>Department of Surgery, The Ohio State University, Columbus, OH, USA.

<sup>6</sup>Department of Neuroscience and Anatomy, Virginia Commonwealth University, Richmond, VA, USA.

<sup>7</sup>Department of Orthopaedics, Emory University School of Medicine, Atlanta, GA, USA

Running title: Ferroptosis in the ENS

\*Corresponding author email address: [ssrini2@emory.edu](mailto:ssrini2@emory.edu) (S.S)

†: Co-first authors contributed equally to this work

## 35 **Materials and Methods**

### 36 37 **Colonic Transit Measurement**

38 A 3 mm glass bead was gently inserted 2 cm into the distal colon under brief isoflurane  
39 anesthesia with lubricant applied to minimize pain. Mice were placed individually in clean cages,  
40 and the time from bead insertion to bead expulsion was recorded.

### 41 42 **Primary Enteric Neuronal Cell Isolation and Culture**

43 The isolated cells were suspended in Neurobasal A Medium (Cat. #10-888-022, Gibco,  
44 Grand Island, NY, USA) enriched with 2 mM L-glutamine (Cat. #25-030-081, Gibco), B27  
45 supplement (Cat. #A3582801, Gibco), penicillin/streptomycin (Cat. #15-140-122, Gibco), 10  
46 ng/mL glial cell line-derived neurotrophic factor (GDNF; Cat. #200-37, Shenandoah  
47 Biotechnology, Warwick, PA, USA), and 1% fetal bovine serum (FBS; Cat. #S10650H, Atlanta  
48 Biologicals, Atlanta, GA, USA). Cells were plated into Matrigel-coated 4-well chamber slides at a  
49 density of  $1 \times 10^4$  cells per well and 6-well plates at  $1 \times 10^5$  cells per well. After five days of  
50 incubation, once the cultures reached confluency, the medium was replaced, and treatments were  
51 initiated. Enteric neuronal cells were exposed to vehicle (10% BSA), Fer-1 (Fer-1, 10  $\mu$ M, Cat.  
52 #SML0583, Sigma-Aldrich, St. Louis, MO, USA), palmitic acid (PA, 0.5 mM; Cat. #P5585, Sigma-  
53 Aldrich), or a combined treatment of PA+Fer-1 for 24 h.

### 54 55 **Culture and Treatment of Mouse Enteric Neuronal Cell Line**

56 IM-FEN were seeded in modified N2 medium supplemented with glial cell line-derived  
57 neurotrophic factor (GDNF; Shenandoah Biotechnology, Warwick, PA, USA), 10% fetal bovine  
58 serum (FBS; Atlanta Biologicals, Flowery Branch, GA, USA), and 20 U/mL recombinant mouse  
59 interferon- $\gamma$  (Chemicon, Cat. #IF005, Temecula, CA, USA). Cells were cultured at 33°C in a  
60 humidified incubator with 5% CO<sub>2</sub>. After 24 h, the culture medium was replaced with Neurobasal-  
61 A medium (Gibco) supplemented with B-27 Plus Supplement (Gibco), 1 mM L-glutamine (Gibco),  
62 1% FBS (Atlanta Biologicals), and GDNF (Shenandoah Biotechnology). Cells were then  
63 transferred to 39°C to promote differentiation. After reaching confluency, treatments were  
64 performed for 24 h using Fer-1 (Fer-1, 10  $\mu$ M; Sigma-Aldrich), palmitic acid (PA, 0.5 mM; Sigma-  
65 Aldrich), a combination of PA and Fer-1 (PA+Fer-1), or vehicle control (10% bovine serum  
66 albumin, BSA; Sigma-Aldrich).

### 67 68 **Palmitic acid Preparation**

69 Palmitic acid (PA; Sigma, P5585, cell culture grade) was prepared by dissolving PA in 200  
70 proof ethanol at 37°C to generate a 250 mM stock solution, which was then added dropwise to a  
71 10 percent (wt/vol) fatty acid free BSA solution (Sigma, A8806) prepared in sterile deionized water  
72 at 37°C with constant mixing to yield a 6 mM palmitate BSA stock. This stock was filter sterilized,  
73 aliquoted, protected from light, stored at -20°C, and diluted into prewarmed culture medium.

74  
75

## 76 **Ca<sup>2+</sup> imaging**

77 IM-FEN were plated at  $2 \times 10^5$  cells per 30 mm dish on number 0 coverslips and grown to  
78 confluency, incubated with 2  $\mu$ M Fluo-4 AM (Invitrogen, Eugene, OR) for 30 min at 37°C in  
79 5%CO<sub>2</sub> followed by 30 min de-esterification. Ca<sup>2+</sup> imaging was carried out on an upright Nikon  
80 Eclipse FN1 microscope with a 20× water-immersion objective using a standard Fluo-4/GCaMP  
81 filter set. LMMP (0.8×0.8cm<sup>2</sup>) was pinned over a Sylgard-embedded glass support for  
82 visualization/imaging. Time-series images of Fluo-4 or GCaMP5g fluorescence were acquired at 7  
83 frames/s using an ANDOR iXon Ultra 897 EMCCD camera (Andor, Belfast, UK) controlled by NIS  
84 Elements software (Nikon). Preparations were perfused at 4 ml/min with oxygenated Krebs solution  
85 containing vehicle, BSA (10%), PA (0.01, 0.1, 0.5 mM), Fer-1 (10  $\mu$ M), or TTX (1  $\mu$ M). Acute PA  
86 exposure was monitored for 10-12 min; TTX was preincubated for 10 min, and Fer-1 for 24 h before  
87 imaging. Perfusate temperature was maintained at 36.5±0.5°C using an in-line heater (Warner  
88 Instruments, Hamden, CT). EFS was delivered via a Grass S88 stimulator (Grass Medical  
89 Instruments, Quincy, MA) using 0.1ms pulses at 40 V for 5 s at 0.5-25 Hz with 3 min inter-stimulus  
90 intervals. To reduce muscle contractions in LMMP, tissues were treated with atropine (10 $\mu$ M) and  
91 nicardipine (3 $\mu$ M). EFS was applied using a field-stimulation chamber (RC-49MFSH, Warner  
92 Instruments).

93

94

## 95 **Propidium Iodide Staining**

96 Two drops each of NucBlue Live reagent (Hoechst 33342) and propidium iodide (PI) were  
97 added directly to 1 mL of cell culture medium, and cells were incubated under standard culture  
98 conditions. After staining, excess dye was removed by washing with PBS. Confocal images were  
99 acquired using a Cytation C10 imaging system (Agilent Technologies), and the number of PI-  
100 positive cells was quantified to determine treatment-induced cell death.

101

## 102 **Lipid peroxidation assay (C11-BODIPY 581/591)**

103 Ferroptotic lipid peroxidation was quantified using the oxidation-sensitive probe C11-  
104 BODIPY 581/591 (Thermo Fisher Scientific, D3861). IM-FEN or primary ENS cultures were  
105 treated with vehicle or palmitic acid with or without Fer-1 (10  $\mu$ M) or DFO (50  $\mu$ M), or with DFO  
106 alone, for the indicated times. Cells were washed once with warm HBSS or phenol red free  
107 medium and incubated with 1  $\mu$ M C11-BODIPY diluted in HBSS for 20-30 min at 37°C in the dark.  
108 After dye loading, cells were washed, maintained in fresh HBSS, and imaged live by confocal  
109 microscopy with sequential acquisition of the reduced (red, ~590 nm) and oxidized (green, ~510  
110 nm) emission channels. Lipid peroxidation was expressed as the ratio of oxidized to reduced C11-  
111 BODIPY signal (green/red) or normalized to vehicle controls, providing a quantitative index of PA-  
112 induced lipid oxidation and its inhibition by Fer-1 or DFO.

113

## 114 **Cell viability assay (CellTiter-Glo ATP)**

115 Cellular ATP content was used as a surrogate for viability using the CellTiter-Glo  
116 Luminescent Cell Viability Assay (Promega) according to the manufacturer's instructions. IM-FEN  
117 cells were plated in white, opaque 96-well plates at 5000 cells/well and allowed to adhere and/or  
118 differentiate as described above, then treated with vehicle or palmitic acid (0.01-4mM) with or  
119 without Ferrostatin-1 for the indicated durations. At the end of 24h treatment, plates were  
120 equilibrated to RT for 10 min, an equal volume of CellTiter-Glo reagent was added directly to each  
121 well, and contents were mixed on an orbital shaker for 2 minutes to induce cell lysis. After a 10-

122 min incubation at RT to stabilize the luminescent signal, ATP-dependent luminescence was  
123 measured on a plate reader. Background signal from cell-free wells was subtracted, and values  
124 were normalized to vehicle-treated controls from the same plate to yield relative ATP levels.

125

### 126 **Trypan Blue cell viability assay**

127 Trypan Blue (0.4% Gibco, Thermo Fisher Scientific; Cat. No. 15250061) was added  
128 directly to the neuronal culture medium at a final concentration of 0.1%. Cultures were incubated  
129 for 3 min at room temperature, gently rinsed with warm medium to remove excess dye, and  
130 immediately imaged. Quantification was performed by counting dye-positive (non-viable) and dye-  
131 negative (viable) cells within fields of view.

132

### 133 **Assay for Mitochondrial Reactive Oxygen Species (ROS)**

134 IM-FEN cells were seeded into 6-well culture plates and grown to approximately 80%  
135 confluency and were then treated with vehicle control (BSA 10%), Ferrostatin-1 (Fer-1; 10  $\mu$ M;  
136 Sigma-Aldrich), palmitic acid (PA; 0.5 mM; Sigma-Aldrich), or a combination of PA and Fer-1  
137 (PA+Fer-1) for 24 h. Following treatment, cells were incubated with 5  $\mu$ M MitoSOX™ Red  
138 mitochondrial superoxide indicator (Cat. #M36008, ThermoFisher Scientific, Eugene, OR, USA)  
139 for 10 minutes in the dark at 39°C. After incubation, cells were washed with PBS and  
140 counterstained with DAPI (Molecular Probes) for 5 minutes. Cells were then washed twice with  
141 PBS and imaged using Cytation C10 imaging system (Agilent Technologies).

142

### 143 **Immunohistochemistry (IHC) Staining and Imaging of Myenteric Ganglia**

144 Paraffin-embedded intestinal tissue samples were sectioned at a thickness of 10  $\mu$ m using  
145 a microtome and mounted onto glass microscope slides. Sections were deparaffinized in xylene  
146 and rehydrated through a descending ethanol gradient. Antigen retrieval was performed by  
147 heating the slides in antigen retrieval buffer (Cat. #ab93678, Abcam, Waltham, MA, USA) at 95 °C  
148 for 20 minutes. Following a gradual return to RT, sections were washed in phosphate-buffered  
149 saline (PBS) and blocked in 5% bovine serum albumin (BSA) prepared in PBS for 1 h at RT.  
150 Primary antibodies as indicated in [Supplementary Table 1](#) were applied to the sections and  
151 incubated overnight at 4 °C with gentle rocking. The following day, slides were washed with PBS  
152 and incubated with appropriate fluorophore-conjugated secondary antibodies ([Supplementary  
153 Table 2](#)) for 1 h at RT. Nuclei were counterstained with DAPI (Molecular Probes), and slides were  
154 mounted using ProLong Gold Antifade Mountant (Invitrogen) before cover slipping.

155

### 156 **Human Tissue Collection and nhMPG Isolation**

157 Resected colon specimens were freshly dissected in cold oxygenated Krebs solution  
158 pinned to sylgard in a 200 mm culture dish. Following removal of serosal fat, the mucosa and  
159 submucosa were carefully micro-dissected away to expose the muscularis externa (ME). The  
160 circular and longitudinal muscle layers were trimmed gradually and carefully from both sides, to  
161 remove as much of the thicker circular muscle as possible without disturbing the networks of  
162 myenteric ganglia using Vannas scissors. The ME was then cut into  $\sim 0.2 \times 0.5$  cm<sup>2</sup> pieces and  
163 placed in 35 mm Petri dishes. Tissues were washed three times for 15 minutes each with sterile  
164 HBSS. Enzymatic digestion was performed using freshly prepared Liberase solution containing  
165 Liberase TH Research Grade (0.75 mg/mL; Cat. #05401151001, Roche, Indianapolis, IN, USA),

166 DNase I (0.1 mg/mL; Sigma-Aldrich, St. Louis, MO, USA), Amphotericin B (250 µg/mL; Cat.  
167 #2571510, Gibco, Grand Island, NY, USA), penicillin/streptomycin (Gibco), and DMEM/F12 (Cat.  
168 #2997898, Gibco). The solution was filtered through a 0.22 µm Millipore Express PES membrane  
169 (Cat. #SLGPR33RS, Merck Millipore, Burlington, MA, USA). Digestion was carried out at 37°C  
170 with 5% CO<sub>2</sub> for 18 h. Following digestion, tissue was gently triturated and rocked at 30 rpm for 1  
171 h on a Corning LSE XL platform rocker (Corning Inc., Corning, NY, USA). Ganglia networks were  
172 collected using an Eppendorf pipettor and diluted in DMEM/F12 to reduce tissue density. Ganglia  
173 were visualized and harvested using a Zeiss Telaval 31 inverted microscope (Zeiss, Oberkochen,  
174 Germany) at 100× magnification.

175

## 176 **Ex Vivo Treatments and Immunostaining of nhMPG**

177 Following PA or PA+Fer-1 treatment, cell death was evaluated using the ReadyProbes  
178 Cell Viability Imaging Kit (Cat. #R37108, Invitrogen, Eugene, OR, USA), where live nhMPG were  
179 incubated with 70 µL of propidium iodide (PI) solution for 30 minutes and then washed four times  
180 with ice-cold PBS (pH 7.4). The tissue was fixed with 4% paraformaldehyde for 10 minutes and  
181 washed again. For immunofluorescence, tissues were blocked with 10% normal donkey serum  
182 (Jackson ImmunoResearch, West Grove, PA, USA) for 1 h and incubated with primary antibodies  
183 overnight at 4°C. The following day, tissues were washed and incubated with secondary  
184 antibodies and DAPI (Cat. #R37606, Invitrogen) for 2 h at RT. Samples were mounted and cover  
185 slipped with 22 × 22 mm glass coverslips (Cat. #1404-10, Globe Scientific, Mahwah, NJ, USA).  
186 Co-labeling of neuronal (HuC/D) and ferroptosis markers (FTH-1, TfR1) was performed in two-  
187 well chamber slides (Cat. #154461, ThermoScientific). Confocal imaging was conducted using a  
188 Nikon A1R confocal microscope (Nikon Instruments, Melville, NY, USA) equipped with a 40×  
189 Plan-Fluor oil DICH N2 objective (NA 1.3, WD 240 µm), and z-stack images (~18 µm total depth  
190 at 0.5 µm intervals) were acquired. A full list of antibodies used is provided in [Supplementary](#)  
191 [Tables 1 and 2](#).

192

## 193 **Quantitative Real-Time PCR (qRT-PCR) and Bulk RNA Sequencing**

194 Total RNA was isolated using the illustra RNAspin Mini Kit (Cat. #25-0500-71, Sigma-  
195 Aldrich, St. Louis, MO, USA) following the manufacturer's protocol. Complementary DNA (cDNA)  
196 was synthesized from purified RNA using the SuperScript IV VILO Master Mix (Cat. #11756050,  
197 ThermoFisher Scientific, Waltham, MA, USA). Quantitative PCR reactions were prepared using  
198 TaqMan Gene Expression Master Mix (Cat. #4369016, ThermoFisher Scientific) and TaqMan`  
199 Gene Expression Assays (ThermoFisher Scientific) targeting specific mouse genes. PCR  
200 amplification and fluorescence detection were performed using the StepOnePlus Real-Time PCR  
201 System (Applied Biosystems, Foster City, CA, USA). The relative expression of neuronal genes,  
202 including nNOS, TUBB3, and Nfe2l2, was normalized to housekeeping genes 18S rRNA or  
203 HPRT1 using the 2<sup>-ΔΔCt</sup> method. A full list of TaqMan assay probes used are provided in  
204 [Supplementary Tables 3](#).

205 IM-FEN cells were cultured under standard conditions and treated with either vehicle (Veh)  
206 or 0.5 mM palmitic acid (PA; Sigma-Aldrich,) for 24 h. Total RNA was isolated, and a total of 12  
207 RNA samples (n = 6 per group) were submitted to Novogene Corporation Inc. (Sacramento, CA,  
208 USA) for transcriptomic profiling using their Plant and Animal Eukaryotic mRNA-seq with  
209 Reference (WBI-Quantification) pipeline.

210

## 211 **Western Blotting**

212 Enteric neuronal cell lysates were prepared using 4× Laemmli Sample Buffer (Cat.  
213 #1610747, Bio-Rad, Hercules, CA, USA) supplemented with Complete Mini Protease Inhibitor  
214 Cocktail Tablets (Cat. #04693116001, Roche Diagnostics, Mannheim, Germany). Protein  
215 samples, along with Precision Plus Protein Dual Color Standards (Cat. #1610374, Bio-Rad), were  
216 separated by SDS-PAGE using 4-20% Criterion TGX Precast Midi Protein Gels (Cat. #5671093,  
217 Bio-Rad) following the manufacturer’s instructions. Proteins were then transferred to Immuno-Blot  
218 PVDF membranes (Cat. #1620177, Bio-Rad) using standard wet transfer conditions. Membranes  
219 were blocked and then incubated overnight at 4°C with primary rabbit antibodies against FTH-1  
220 (1:1000; Abcam, Cambridge, MA, USA) and mouse anti-β-actin (1:5000; Cell Signaling  
221 Technology, Danvers, MA, USA). Following PBS-T washes, membranes were treated with  
222 horseradish peroxidase (HRP)-linked secondary antibodies targeting either rabbit or mouse IgG  
223 (Cell Signaling Technology) at a 1:5000 dilution. Bands were visualized using chemiluminescence  
224 detection, and semi-quantitative band intensity analysis was performed using ImageJ software  
225 (National Institutes of Health, Bethesda, MD, USA).  
226

## 227 **Volumetric Analysis of Confocal Z-Stacks from Human Myenteric Ganglia**

228 Within each experiment, all treatment groups were imaged using identical confocal  
229 acquisition parameters, and the same segmentation and thresholding settings were applied  
230 across all z-stacks in that dataset (i.e. laser lines, laser power, detector gain, offset, pinhole, scan  
231 speed, frame size, and zoom). Image quantification was performed using NIS Elements software  
232 (version AR 5.42.05, Nikon Instruments, Melville, NY, USA). Each treatment condition was tested  
233 using tissue from a minimum of three colectomy patients, and 12 individual z-stacks each  
234 representing an isolated ganglionic network. Therefore, for each treatment 36 z-stacks were  
235 analyzed. Analysis included total number and area of PI<sup>+</sup> and HuC/D<sup>+</sup> cells per field, co-  
236 localization area of PI and HuC/D, area of DAPI<sup>+</sup> nuclei, density and pixel intensity of HuC/D<sup>+</sup>  
237 neurons, and extent of nuclear translocation based on HuC/D-DAPI overlap. Expression of  
238 ferroptosis markers, including FTH1 and TfR1, was assessed specifically in HuC/D<sup>+</sup> neurons, with  
239 quantification based on number of co-labeled cells, signal intensity, and co-localized area.  
240

## 241 **Supplementary Figures**

242 **Supplementary Figure 1. Palmitic acid modulates genes involved in calcium signaling and**  
243 **neurotransmission in enteric neurons.** (A-D) Heatmaps showing transcriptional changes in  
244 immortalized enteric neuronal cells (IM-FEN) treated with vehicle (Veh) or palmitic acid (PA, 0.5  
245 mM) for 24 hours (n = 6 per group). Bulk RNA-seq was performed to assess global gene  
246 expression changes. (A) Calcium signaling-related genes including ion channels, calcium pumps,  
247 and calcium-binding proteins were significantly altered by PA, indicating disrupted intracellular  
248 calcium homeostasis. (B) Synaptic transmission-related genes including components of synaptic  
249 vesicles and exocytosis machinery were broadly downregulated following PA exposure,  
250 suggesting impaired synaptic function. (C) Genes involved in excitatory neurotransmission were  
251 reduced in PA-treated cells, consistent with suppression of excitatory signaling pathways. (D)  
252 Genes associated with inhibitory neurotransmission showed partial decreased expression,  
253 suggesting a broader disruption in the excitatory/inhibitory neuronal balance. Heatmap values  
254 represent log<sub>2</sub>-transformed, z-score normalized gene expression. Columns represent individual  
255 biological replicates, clustered to illustrate treatment-specific transcriptional signatures.  
256

257 **Supplementary Figure 2: Palmitic acid induces heat shock protein expression in enteric**  
258 **neurons and western diet increases body weight in mice.** (A) Heatmap showing differential

259 expression of heat shock proteins (HSPs) in IM-FEN cells treated with vehicle (Veh) or palmitate  
260 (PA, 0.5 mM) for 24 hours (n = 6 per group). Genes include molecular chaperones and protein-  
261 folding regulators involved in cellular stress responses. Values are log<sub>2</sub>-transformed, z-score  
262 normalized counts. Hierarchical clustering reveals distinct separation between Veh- and PA-  
263 treated cells, with robust upregulation of HSPs following PA exposure. (B) Heatmap of lipid  
264 metabolism and obesity-related gene expression in IM-FEN cells treated with vehicle (Veh) or  
265 palmitic acid (PA, 0.5 mM) for 24 h. (C) Heatmap of inflammatory signaling and  
266 neurotransmission-associated motility regulators in the same conditions. (D-E) Body weight  
267 measurements of male (D) and female (E) mice over a 12-week period. Mice were fed control diet  
268 (CD) or Western diet (WD) and received AAV-eGFP or AAV-Nfe2l2 at week 2. WD-fed animals  
269 of both sexes gained significantly more weight over time compared to RD-fed controls,  
270 irrespective of AAV treatment. Data are presented as mean ± SEM; n = 4-6 mice per group.  
271

272 **Supplementary Figure 3. AAV-mediated overexpression of Nfe2l2 enhances neuronal**  
273 **Nfe2l2 expression in the colon.** A) Quantitative RT-PCR analysis showing increased colonic  
274 Nfe2l2 mRNA expression in AAV-Nfe2l2-treated mice compared to AAV-eGFP controls. Data  
275 represent technical triplicates from male and female samples and confirm successful AAV  
276 overexpression. Data represent mean ± SEM. Statistical analysis was performed using t-test. \*P<  
277 0.05; \*\*\*P < 0.001; B) Representative whole-mount confocal images of the myenteric plexus  
278 displaying eGFP fluorescence in mice treated with AAV-eGFP (Control) or AAV-Nfe2l2. Images  
279 confirm effective viral transduction across the enteric neuronal network. Scale bar, 50 µm.

280 **Supplementary Figure 4. AAV-Nfe2l2 preserves neuronal nitric oxide synthase (nNOS)**  
281 **expression in the colonic myenteric plexus of Western diet-fed mice.** Representative  
282 immunofluorescence images of colon tissue sections from male and female mice fed control diet  
283 (CD) or Western diet (WD) for 12 weeks and treated with AAV-eGFP or AAV-Nfe2l2. Sections  
284 were co-stained for the pan-neuronal marker TUBB3 (cyan) and neuronal nitric oxide synthase  
285 (nNOS, red). Merged images highlight co-localization of nNOS within TUBB3+ neurons. AAV-  
286 Nfe2l2 administration preserved nNOS expression in WD-fed mice compared to AAV-eGFP  
287 controls. Quantification of the proportion of nNOS+ neurons among total TUBB3+ neurons across  
288 groups. A total of 28 mice were used: n = 4 mice per group for CD and WD AAV-eGFP, and n =  
289 3 mice per group for CD and WD AAV-Nfe2l2. From each mouse, 6-10 randomly selected  
290 myenteric ganglia were imaged and analyzed. Data represent mean ± SEM. Statistical analysis  
291 was performed using two-way ANOVA. \*P < 0.05; \*\*P < 0.01; \*\*\*P < 0.001; ns = not significant.  
292 Scale bars, 50 µm.  
293

294 **Supplementary Figure 5. Logistics and timeline for procurement of human colon surgical**  
295 **specimens, isolation of human networks of ganglia and in vitro experiments with palmitic**  
296 **acid.** (A) Schematic showing the timeline from patient consent to isolation of nhMPG networks  
297 and palmitic acid induction experiments. (B) Examples of nhMPG networks obtained after  
298 colectomy in human patients are shown with transmitted light imaging.

299  
300 **Supplementary Figure 6. Differential Induction of Neuronal and Non-Neuronal TfR1**  
301 **Expression by PA, FAC, and LPS in Human nhMPG Networks.** (A-E) Representative confocal  
302 images of human networks of myenteric ganglia (nhMPG) treated with ferric ammonium citrate  
303 (FAC, 100 µM) or lipopolysaccharide (LPS, 1 µg/mL) for 24 h. Sections were stained for DAPI  
304 (blue), the pan-neuronal marker HuC/D (red), and transferrin receptor 1 (TfR1, green). Merged  
305 images show co-localization of neuronal TfR1 (yellow). Representative confocal images of FAC-  
306 treatment, shown as z-stack projections from different fields of view, increased neuronal TfR1  
307 expression (A-D), while LPS also induced TfR1 expression in enteric neurons (E). (F-G) Additional

308 examples of LPS-treated ganglia showing broad upregulation of TfR1 in both neuronal and non-  
309 neuronal regions. (H-K) Quantification of TfR1 expression across conditions. (H) Neuronal TfR1  
310 expression/field was significantly increased by PA (0.5 mM) and LPS (1  $\mu$ g/mL) to a similar extent,  
311 while FAC induced a markedly greater increase. (I) FAC induced neuronal TfR1 expression in a  
312 significantly larger number of HuC/D<sup>+</sup> neurons per field compared to PA. (J) In contrast, non-  
313 neuronal TfR1 expression was significantly greater with PA than with FAC, based on both total  
314 area and number of distinct TfR1-positive regions per field. (K) Pixel intensity analysis revealed  
315 that FAC resulted in marginally but significantly higher TfR1 intensity than PA. All data were  
316 analyzed by one-way ANOVA followed by Tukey's post hoc test. Values represent mean  $\pm$  SEM.  
317 \*P < 0.05, \*\*P < 0.01, \*\*\*P < 0.001. Quantification of TfR1 expression was performed using Nikon  
318 NIS-Elements co-localization module from 18  $\mu$ m-thick z-stacks acquired at 0.5  $\mu$ m intervals.  
319

320 **Supplementary Figure 7. Palmitic acid disrupts ganglionic morphology and induces glial**  
321 **activation in human nhMPG networks.** (A-B) Representative confocal images showing  
322 structural abnormalities in human myenteric ganglia (nhMPG) following PA (0.5 mM, 24 h)  
323 treatment. Distortion or fragmentation of the ganglionic network was observed in a subset of  
324 patient samples. (C) PA treatment induced glial fibrillary acidic protein (GFAP) expression in  
325 HuC/D glial cells within the nhMPG, consistent with reactive gliosis. GFAP is not typically detected  
326 in healthy human enteric glia. Quantification was performed in ganglionic networks from a  
327 representative patient (n = 9 networks per condition). Values are expressed as mean  $\pm$  SEM. \*P  
328 < 0.05, \*\*P < 0.01, \*\*\*P < 0.001.  
329

330 **Supplementary Figure 8. Palmitate induces lipid peroxidation and ferroptosis-dependent**  
331 **loss of nNOS, ChAT, and TH enteric neurons.** (A) Cell viability of IM-FEN enteric neurons  
332 treated for 24 h with increasing concentrations of palmitate (PA, 0.01-4 mM) measured by  
333 CellTiter-Glo. 0.5 mM PA (red bar) was chosen for subsequent experiments as it reduced viability  
334 without causing overt cell loss. (B) C11-BODIPY fluorescence in IM-FEN cells treated for 24  
335 h with vehicle (Veh), PA (0.5 mM), ferrostatin-1 (Fer-1, 10  $\mu$ M), PA + Fer-1, deferoxamine (DFO,  
336 50  $\mu$ M), or PA + DFO. PA increases lipid peroxidation (oxidized C11-BODIPY signal), which is  
337 attenuated by Fer-1 and DFO. Histogram shows normalized oxidized/reduced C11-BODIPY  
338 fluorescence relative to Veh. (C) Confocal images of primary enteric neuron networks treated with  
339 Veh, PA, Fer-1, or PA + Fer-1 for 24 h and stained for TUBB3 (green), nNOS (red), ChAT (cyan),  
340 and TH (magenta). Quantification of nNOS-, ChAT-, and TH-expressing neurons demonstrates  
341 loss of all three neuronal populations with PA, partially restored by Fer-1. Scale bars: 50  $\mu$ m. Data  
342 represent mean  $\pm$  SEM from three independent experiments; Values are expressed as mean  $\pm$   
343 SEM. \*P < 0.05, \*\*P < 0.01, \*\*\*P < 0.001.  
344

345 **Supplementary Figure 9. Time dependent induction of ferroptosis genes, loss of viability,**  
346 **and mitochondrial ROS during palmitate exposure in enteric neurons.** (A-D) qRT-PCR  
347 analysis of ferroptosis-related genes transferrin receptor 1 (Tfr1), Il6, Gpx4, and Aifm2 in IM-FEN  
348 enteric neurons treated with vehicle (Veh) or palmitate (PA, 0.5 mM) for 0, 4, 12, and 24 h. Data  
349 are expressed as fold change in mRNA relative to time-matched Veh. (E) Trypan Blue cell viability  
350 assay of IM-FEN enteric neurons showing that acute PA exposure does not significantly reduce  
351 viability, whereas chronic PA markedly decreases viable neurons, an effect prevented by chronic  
352 Fer-1 co-treatment. (F) Representative images of MitoSOX Red (mitochondrial superoxide) and  
353 DAPI in IM-FEN neurons treated with Veh or PA for 24 h, with quantification of MitoSOX  
354 fluorescence intensity normalized to Veh, demonstrating increased mitochondrial ROS after PA  
355 exposure. Scale bars: 50  $\mu$ m. Data represent mean  $\pm$  SEM from three independent experiments;  
356 Values are expressed as mean  $\pm$  SEM. \*P < 0.05, \*\*P < 0.01, \*\*\*P < 0.001; ns, not significant.  
357

358 **Supplementary Figure 10. Western diet increases Drp1 and 4-HNE in TH-positive myenteric**  
359 **neurons *in vivo*.** Representative confocal images of distal colon myenteric plexus from mice fed  
360 control diet (CD) or Western diet (WD) for 12 weeks, stained for the pan-neuronal marker TUBB3  
361 (green), tyrosine hydroxylase (TH, cyan), the mitochondrial fission protein Drp1 (magenta), and  
362 the lipid peroxidation marker 4-HNE (red). Dashed lines outline TH-positive neuronal cell bodies  
363 and processes. Merged images show increased Drp1 and 4-HNE within TH-positive neurons in  
364 Western diet exposed mice compared with controls, mapping mitochondrial stress and lipid  
365 peroxidation in this catecholaminergic subset. Bar graphs quantify TH-positive neuron density  
366 and Drp1 and 4-HNE fluorescence intensity within TH-positive neurons. Scale bars: 20  $\mu$ m. Data  
367 represent mean  $\pm$  SEM from n = 4 mice per group; Data represent mean  $\pm$  SEM from three  
368 independent experiments; Values are expressed as mean  $\pm$  SEM. \*P < 0.05, \*\*P < 0.01, \*\*\*P <  
369 0.001; ns, not significant.

370 **Supplementary Figure 11. Western diet increases Drp1 and 4-HNE in nNOS-positive**  
371 **myenteric neurons *in vivo*.** Representative confocal images of distal colon myenteric plexus  
372 from mice fed control diet (CD) or Western diet (WD) for 12 weeks, stained for the pan-neuronal  
373 marker TUBB3 (green), neuronal nitric oxide synthase (nNOS, red), the mitochondrial fission  
374 protein Drp1 (magenta), and the lipid peroxidation marker 4-HNE (cyan). Dashed lines outline  
375 nNOS-positive neuronal cell bodies and processes. Merged images show increased Drp1 and 4-  
376 HNE signal within nNOS-positive neurons in Western diet exposed mice compared with controls,  
377 mapping mitochondrial stress and lipid peroxidation in this nitrergic subset. Bar graphs quantify  
378 nNOS-positive neuron density and Drp1 and 4-HNE fluorescence intensity within nNOS-positive  
379 neurons. Scale bars: 20  $\mu$ m. Data represent mean  $\pm$  SEM from n = 4 mice per group; Data  
380 represent mean  $\pm$  SEM from three independent experiments; Values are expressed as mean  $\pm$   
381 SEM. \*P < 0.05, \*\*P < 0.01, \*\*\*P < 0.001.

382  
383 **Supplementary Figure 12. Western diet alters Drp1 and 4-HNE in ChAT-positive myenteric**  
384 **neurons in a sex-dependent manner.** Representative confocal images of distal colon myenteric  
385 plexus from mice fed control diet (CD) or Western diet (WD) for 12 weeks, stained for the pan-  
386 neuronal marker TUBB3 (green), choline acetyltransferase (ChAT, red), the mitochondrial fission  
387 protein Drp1 (magenta), and the lipid peroxidation marker 4-HNE (cyan). Dashed lines outline  
388 ChAT-positive neuronal cell bodies and processes. Merged images show increased 4-HNE signal  
389 within ChAT-positive neurons in Western diet exposed mice compared with controls, consistent  
390 with enhanced lipid peroxidation. Quantification demonstrates that Drp1 intensity within ChAT-  
391 positive neurons is unchanged in males and reduced in females, whereas ChAT-positive neuron  
392 density in females is not significantly altered. Scale bars: 20  $\mu$ m. Data represent mean  $\pm$  SEM  
393 from three independent experiments; Values are expressed as mean  $\pm$  SEM. \*P < 0.05, \*\*P <  
394 0.01, \*\*\*P < 0.001.

395  
396 **Supplementary Figure 13. Western diet suppresses phospho-Nfe2I2 in myenteric neurons**  
397 **and AAV Nfe2I2 restores antioxidant signaling.** Immunofluorescence staining of distal colon  
398 sections from male and female mice fed control diet or Western diet and treated with AAV-eGFP  
399 or AAV-Nfe2I2, co-stained for TUBB3 (cyan) and phospho Nfe2I2 (P-Nfe2I2, red). Merged images  
400 show reduced neuronal P Nfe2I2 signal in Western diet AAV eGFP groups and enhanced P-  
401 Nfe2I2 expression within TUBB3<sup>+</sup> neurons in Western diet AAV Nfe2I2 treated mice. Histograms  
402 show fold change in TUBB3<sup>+</sup> neuron density and P-Nfe2I2 fluorescence intensity within TUBB3<sup>+</sup>  
403 neurons, normalized to the control diet AAV eGFP group. Scale bars: 50  $\mu$ m. Data represent  
404 mean  $\pm$  SEM from n = 3-4 mice per group. Statistical analysis was performed using two-way  
405 ANOVA. \*P < 0.05; \*\*P < 0.01; \*\*\*P < 0.001; ns, not significant.

406  
407 **Supplementary Figure 14. Concentration-dependent effect of palmitic acid on induction of**  
408 **neuronal cell death in nhMPG networks.** Networks of human myenteric ganglia (nhMPG)

409 isolated from GI surgical specimens were exposed in vitro to vehicle (Veh, DMEM, 0.25mM or  
410 0.5mM PA concentration for 24 h). PA 0.25mM consistently mirrored vehicle responses and  
411 therefore did not trigger ferroptotic injury. PA had no effect on (A) HuC/D nuclear translocation  
412 (stress response in neurons), (B) neuronal cell death, PI nuclear staining) and (C) HuC/D cell  
413 expression. (D-F) In contrast, PA 0.5mM elicited robust cell-death and stress-response signals.  
414 Statistical comparisons were performed by one-way ANOVA followed by Tukey's post hoc test.  
415 Data are presented as mean  $\pm$  SEM; \*P < 0.05, \*\*P < 0.01, \*\*\*P < 0.001; ns, not significant.  
416 Quantification of cell death and HuC/D translocation was conducted using Nikon NIS-Elements  
417 colocalization tools in 18- $\mu$ m confocal z-stacks acquired at 0.5- $\mu$ m intervals. A total of 36  
418 ganglionic networks per treatment group were analyzed. Human colonic tissue was obtained from  
419 3 human subjects for each treatment, with 12 z-stacks from distinct nhMPG networks per human  
420 subject used for all colocalization and statistical analyses.

421  
422 **Supplementary Figure 15. Concentration-dependent increase in neuronal TfR1 activation**  
423 **by palmitic acid (PA) in nhMPG networks.** The effect of palmitic acid was restricted to 0.5mM  
424 concentration. A lower concentration of 0.25mM had no effect on TfR1 activation. Networks of  
425 human myenteric ganglia (nhMPG) isolated from colectomy specimens were exposed ex vivo to  
426 Veh, DMEM, PA 0.25mM or PA 0.5mM. PA (0.25mM) did not increase TfR1 expression in (A) the  
427 number of HuC/D<sup>+</sup>TfR1<sup>+</sup> neurons, (B) TfR1<sup>+</sup> area of colocalization with HuC/D<sup>+</sup>, and (C) the pixel  
428 intensity of neuronal TfR1 immunoreactivity. In contrast, PA 0.5mM produced consistent evidence  
429 of ferroptotic signaling, with (D) significant increases in HuC/D<sup>+</sup>TfR1<sup>+</sup> neuronal counts, (E) TfR1<sup>+</sup>  
430 area per neuron and (F) neuronal TfR1 fluorescence intensity. Statistical comparisons were  
431 performed using one-way ANOVA followed by Tukey's post hoc test. Data are reported as mean  
432  $\pm$  SEM; \*P < 0.05, \*\*P < 0.01, \*\*\*P < 0.001; ns, not significant. Quantification of TfR1 expression  
433 was performed using Nikon NIS-Elements colocalization tools in 18- $\mu$ m confocal z-stacks  
434 collected at 0.5- $\mu$ m optical intervals. A total of 36 ganglionic networks per treatment group were  
435 analyzed. Human colonic tissue was obtained from 3 GI surgical cases, with 12 z-stacks from  
436 distinct nhMPG networks per human subject included in colocalization and statistical analyses.

437  
438 **Supplementary Figure 16. Concentration-dependent Ferritin (FTH-1) ferroptotic responses**  
439 **to palmitic acid in human myenteric ganglia, with neuronal susceptibility occurring mainly**  
440 **at 0.5mM PA.** Networks of human myenteric ganglia (nhMPG) isolated from colectomy  
441 specimens were treated in vitro with vehicle, DMEM, PA 0.25mM or PA 0.5mM concentration.  
442 Ferritin (FTH-1) activation in neuronal (HuC/D<sup>+</sup>) and non-neuronal (HuC/D<sup>-</sup>) cell populations was  
443 analyzed for complementary quantitative parameters. (A) PA 0.25mM did not increase neuronal  
444 Ferritin in nhMPG networks compared to Veh, whereas upregulation occurred in comparison to  
445 the DMEM group. (B) In contrast, PA 0.5mM triggered a ferroptotic response, with significant  
446 increases in Ferritin (FTH-1) pixel intensity in HuC/D<sup>+</sup> neurons, number of Ferritin<sup>+</sup>HuC/D<sup>+</sup>  
447 neurons, and Ferritin-HuC/D colocalized area, all reflecting robust neuronal FTH-1 upregulation.  
448 (C, D) In non-neuronal cells, PA 0.25mM or PA 0.5mM both elicited ferroptotic changes in  
449 comparison to Veh across all metrics: number of Ferritin<sup>+</sup> non-neuronal cells, non-neuronal area,  
450 and pixel intensity in non-neuronal Ferritin<sup>+</sup> cells. Statistical comparisons were performed by one-  
451 way ANOVA followed by Tukey's post hoc test. Values are presented as mean  $\pm$  SEM; \*P <  
452 0.05, \*\*P < 0.01, \*\*\*P < 0.001; ns, not significant. Quantification of Ferritin expression and  
453 colocalization was performed using Nikon NIS-Elements on 18- $\mu$ m confocal z-stacks acquired at  
454 0.5- $\mu$ m optical intervals. Thirty- six ganglionic networks per treatment group were analyzed.  
455 Colonic tissue was collected from 3 human donors, with 12 z-stacks from distinct nhMPG  
456 networks per human subject specimen included in all analyses.

457

458

**Supplementary Table 1: List of Primary antibodies**

|    | <b>Gene</b>          | <b>Host</b> | <b>Cat no.</b> | <b>Conc</b> | <b>Company</b> | <b>City</b> | <b>State</b> | <b>Country</b> |
|----|----------------------|-------------|----------------|-------------|----------------|-------------|--------------|----------------|
| 1  | TUBB3                | MS          | AB78078        | 1:400       | Abcam          | Waltham     | MA           | USA            |
| 2  | TUBB3                | RB          | AB52623        | 1:400       | Abcam          | Waltham     | MA           | USA            |
| 3  | TUBB3                | CK          | TUJ-0020       | 1:400       | Aves Labs      | Davis       | CA           | USA            |
| 4  | p-NFE2L2             | RB          | PA5-67520      | 1:200       | ThermoFisher   | Rockford    | IL           | USA            |
| 5  | 4-HNE                | MS          | MA5-27570      | 1:200       | ThermoFisher   | Rockford    | IL           | USA            |
| 6  | MFRN2                | RB          | BS-7157R       | 1:200       | ThermoFisher   | Rockford    | IL           | USA            |
| 7  | FTH-1                | RB          | AB75973        | 1:200       | Abcam          | Waltham     | MA           | USA            |
| 8  | TfR1                 | MS          | MABC1765       | 1:200       | Sigma-Aldrich  | St. Louis   | MO           | USA            |
| 9  | Huc/D                | MS          | A21271         | 1:200       | Invitrogen     | Carlsbad    | CA           | USA            |
| 10 | Huc/D                | RB          | AB184267       | 1:250       | Abcam          | Waltham     | MA           | USA            |
| 11 | ALOX15               | RB          | AB244205       | 1:200       | Abcam          | Waltham     | MA           | USA            |
| 12 | GPX4                 | MS          | 67763-1-1G     | 1:200       | Proteintech    | Rosemont    | IL           | USA            |
| 13 | t-NFE2L2             | RB          | PA5-27882      | 1:200       | ThermoFisher   | Rockford    | IL           | USA            |
| 14 | nNOS                 | RB          | AB76067        | 1:200       | Abcam          | Waltham     | MA           | USA            |
| 15 | $\beta$ -actin       | MS          | 3700S          | 1:5000      | Cell Signaling | Danvers     | MA           | USA            |
| 16 | GFAP                 | CK          | AB4674         | 1:250       | Abcam          | Waltham     | MA           | USA            |
| 17 | Tyrosine Hydroxylase | GT          | ab317795       | 1:200       | Abcam          | Waltham     | MA           | USA            |
| 18 | DRP1                 | RB          | ab184247       | 1:200       | Abcam          | Waltham     | MA           | USA            |
| 19 | ChAT                 | MS          | CL3173         | 1:200       | ThermoFisher   | Rockford    | IL           | USA            |
| 20 | ChAT                 | GT          | AB144P         | 1:200       | Sigma-Aldrich  | St. Louis   | MO           | USA            |
| 21 | nNOS                 | GT          | GTX89962       | 1:200       | GeneTex        | Irvine      | CA           | USA            |

460  
461  
462  
463  
464  
465  
466  
467  
468  
469  
470  
471  
472  
473  
474  
475

476  
477

**Supplementary Table 2: List of Secondary antibodies**

| No | Antibody                                                | Host | Cat no.      | Conc  | Company              | Fluor -<br>ophore | City     | State | Country |
|----|---------------------------------------------------------|------|--------------|-------|----------------------|-------------------|----------|-------|---------|
| 1  | anti-<br>mouse,<br>Alexa 568                            | DK   | A11041       | 1:400 | Fisher<br>Scientific | 568               | Waltham  | MA    | USA     |
| 2  | anti-rabbit,<br>Alexa 568                               | DK   | A10042       | 1:400 | Fisher<br>Scientific | 568               | Waltham  | MA    | USA     |
| 3  | anti-<br>chicken,<br>Alexa 488                          | GT   | A11039       | 1:400 | Fisher<br>Scientific | 488               | Waltham  | MA    | USA     |
| 4  | anti-rabbit,<br>Alexa 488                               | DK   | A21206       | 1:400 | Fisher<br>Scientific | 488               | Waltham  | MA    | USA     |
| 5  | anti-<br>mouse,<br>Alexa 488                            | DK   | A21202       | 1:400 | Fisher<br>Scientific | 488               | Waltham  | MA    | USA     |
| 6  | anti-rabbit,<br>Alexa 568                               | GT   | A-<br>11011  | 1:200 | ThermoFi<br>sher     | 568               | Rockford | IL    | USA     |
| 7  | anti-<br>chicken,<br>Alexa 633                          | GT   | A-<br>21103  | 1:200 | ThermoFi<br>sher     | 633               | Rockford | IL    | USA     |
| 8  | Anti-<br>Chicken<br>IgY H&L<br>(Alexa<br>Fluor®<br>488) | GT   | ab1501<br>69 | 1:200 | Abcam                | 488               | Waltham  | MA    | USA     |
| 9  | anti-Goat -<br>405                                      | Dk   | A48259       | 1:200 | ThermoFi<br>sher     | 405               | Rockford | IL    | USA     |
| 10 | anti-<br>Mouse-<br>405                                  | DK   | A48257       | 1:200 | ThermoFi<br>sher     | 405               | Rockford | IL    | USA     |
| 11 | anti-<br>Rabbit-680                                     | DK   | A32802       | 1:200 | ThermoFi<br>sher     | 680               | Rockford | IL    | USA     |
| 12 | anti-Goat -<br>546                                      | DK   | A-<br>11056  | 1:200 | ThermoFi<br>sher     | 546               | Rockford | IL    | USA     |
| 13 | anti-<br>Mouse-<br>680                                  | DK   | A10038       | 1:200 | ThermoFi<br>sher     | 680               | Rockford | IL    | USA     |

478  
479  
480  
481  
482  
483

484 **Supplementary Table 3: List of TaqMan probes**

| No | Gene     | TaqMan Probe ID | Gene Name                                         |
|----|----------|-----------------|---------------------------------------------------|
| 1  | nNOS     | Mm01208059_m1   | Nitric oxide synthase 1 (neuronal)                |
| 2  | TUBB3    | Mm00727586_s1   | Tubulin beta 3 class III                          |
| 3  | Nfe2l2   | Mm00477784_m1   | Nuclear factor, erythroid 2-like 2 (Nrf2)         |
| 4  | 18s rRNA | Mm03928990_g1   | 18S ribosomal RNA                                 |
| 5  | HPRT1    | Mm00446968_m1   | Hypoxanthine guanine phosphoribosyl transferase 1 |
| 6  | IL-6     | Mm00446190_m1   | Interleukin 6                                     |
| 7  | TfR1     | Mm00441941_m1   | Transferrin receptor 1                            |
| 8  | GPX4     | Mm00515041_m1   | Glutathione peroxidase 4                          |
| 9  | DMT1     | Mm00435363_m1   | Solute carrier family 11 member 2 (DMT1)          |
| 10 | SLC40A1  | Mm01254822_m1   | Solute carrier family 40 member 1 (ferroportin)   |

485

486

487 **Supplementary Table 4: Human subject information related to the surgical procedure, gut**  
 488 **specimens, medications, incidents of diabetes, clinical lab analysis for DM, iron metabolism,**  
 489 **lipid profile and CRP.**

| Patient ID | GI region       | Type of surgery                      | Sex | BMI kg/m <sup>2</sup> | Age | Race  | HgbA1C (date) | Ferritin (date) | Transferrin (date) | CRP (date) | Cholesterol (date) | HDL | LDL | VLDL | Triglycerids | Non-HDL cholesterol | DM                                     | Medications                                   |
|------------|-----------------|--------------------------------------|-----|-----------------------|-----|-------|---------------|-----------------|--------------------|------------|--------------------|-----|-----|------|--------------|---------------------|----------------------------------------|-----------------------------------------------|
| EN-F01     | Ascending colon | Colectomy partial laparoscopic right | M   | 21.25                 | 71  | White | -             | -               | 453.3 mg/d         | -          | 170 mg/dl          | 34  | 123 | -    | 114          | 130                 | no                                     | MOM <sup>4</sup> 30 ml daily for constipation |
| EN-F02     | Ascending colon | Colectomy partial laparoscopic right | M   | 21.4                  | 59  | White | 6.2%          | -               | -                  | -          | 57 mg/dl           | 20  | 28  | -    | 47           | 37                  | no                                     | NA <sup>5</sup>                               |
| EN-F03     | Ascending colon | Colectomy partial laparoscopic right | F   | 46.76                 | 59  | White | 5.30%         | -               | -                  | 73.69 mg/L | 161 mg/dl          | 43  | 91  | 27   | 137          | -                   | no                                     | NA                                            |
| EN-F04     | Ascending colon | Colectomy partial laparoscopic right | F   | 29.33                 | 58  | White | 4.80%         | -               | -                  | -          | 199 mg/dl          | 110 | 79  | -    | 50           | 89                  | no                                     | NA                                            |
| EN-F05     | Sigmoid colon   | Colectomy partial open left          | F   | 34.94                 | 68  | White | 5.40%         | 10.2 ng/ml      | 360 mg/dl          | 3.66 mg/L  | 96 mg/dl           | 23  | -   | -    | 128          | 132                 | IFG <sup>1</sup>                       | metamucil for constipation                    |
| EN-F06     | Sigmoid colon   | Colectomy partial laparoscopic left  | F   | 26.1                  | 54  | White | 4.80%         | -               | -                  | 241 mg/dl  | 219 mg/d           | 64  | 142 | 13   | 65           | -                   | no                                     | NA                                            |
| EN-F07     | Sigmoid colon   | Colectomy partial laparoscopic left  | M   | 30.48                 | 44  | White | 4.90%         | -               | -                  | -          | 275 mg/dl          | 42  | 216 | 17   | 86           | -                   | no                                     | NA                                            |
| EN-F08     | Sigmoid colon   | Colectomy partial robotic XI left    | F   | 37.69                 | 61  | White | -             | -               | -                  | -          | -                  | -   | -   | -    | -            | -                   | DM <sup>3</sup> type 2/ use of insulin | Miralax                                       |
| EN-F09     | Ascending colon | Colectomy partial robotic XI right   | M   | 41.05                 | 54  | Black | 5.50%         | -               | -                  | -          | 117 mg/d           | 48  | 57  | 12   | 62           | -                   | IFG <sup>1</sup>                       | Miralax                                       |
| EN-F10     | Ascending colon | Colectomy partial laparoscopic right | M   | 28.43                 | 78  | White | -             | -               | -                  | -          | 132 mg/dl          | 40  | 68  | 24   | 120          | 92                  | no                                     | on chemo with leucovorin, FOLFOX <sup>2</sup> |
| EN-F11     | Sigmoid colon   | Colectomy partial laparoscopic left  | M   | 32.22                 | 73  | White | -             | 237.5 ng/ml     | 180 mg/dl          | -          | 159 mg/dl          | 35  | 101 | 23.4 | 117          | 124                 | no                                     | NA                                            |
| EN-F12     | Ascending colon | Colectomy partial robotic XI right   | M   | 22.23                 | 67  | White | 5.30%         | 30 ng/L         | -                  | 5.7 mg/L   | 241 mg/dl          | 43  | 165 | 33   | 164          | -                   | no                                     | NA                                            |
| EN-F13     | Sigmoid colon   | Colectomy partial robotic XI left    | F   | 35.2                  | 67  | White | -             | -               | -                  | -          | 119 mg/dl          | 38  | 58  | -    | 114          | -                   | no                                     | NA                                            |
| EN-F14     | Sigmoid colon   | Colectomy partial robotic XI left    | M   | 35.27                 | 75  | White | 7.20%         | -               | -                  | -          | 106 mg/dl          | 41  | 50  | -    | -            | -                   | DM <sup>3</sup> type 2                 | NA                                            |

490

491 IFG<sup>1</sup> - impaired fasting glucose; FOLFOX<sup>2</sup> - fluorouracil and oxaliplatin; DM<sup>3</sup> mellitus;

492 MOM<sup>4</sup> - magnesium hydroxide; NA<sup>5</sup> - not applicable.

493

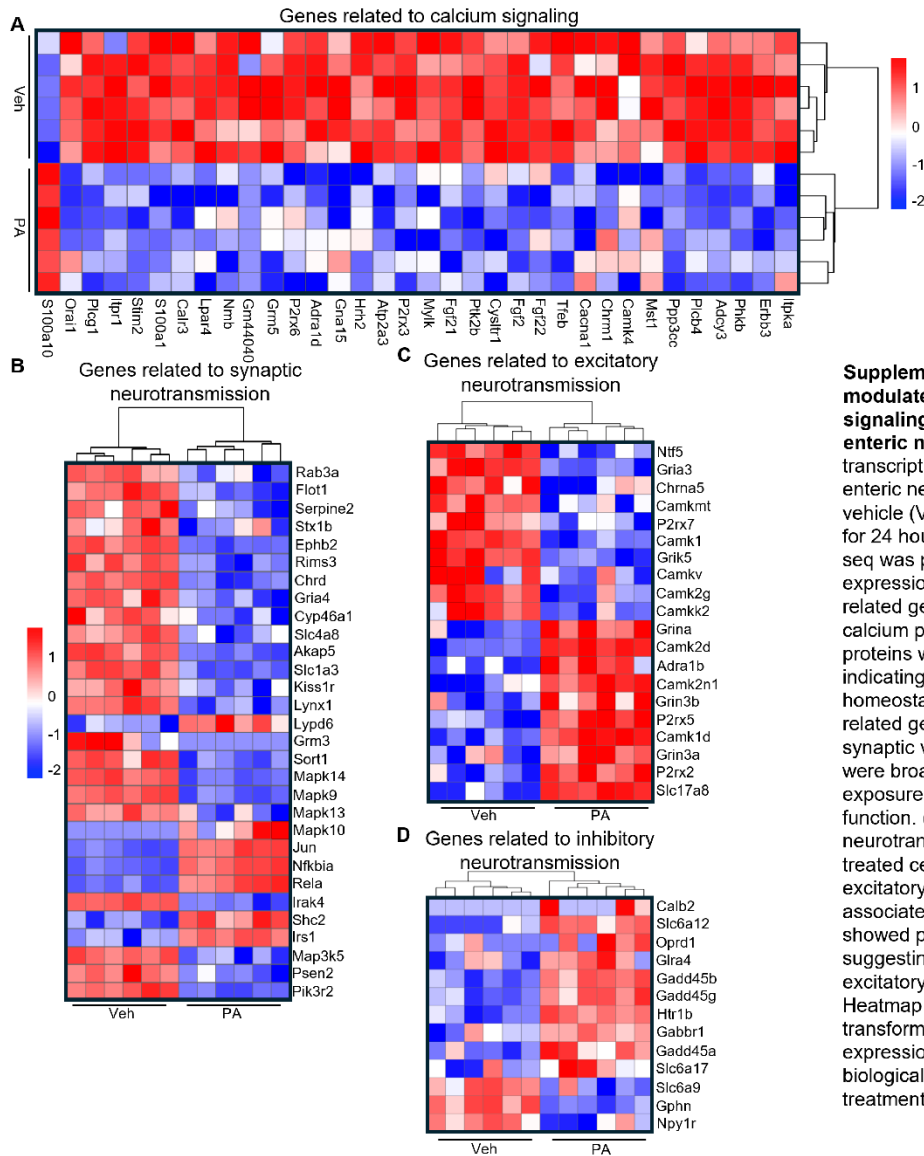

**Supplementary Figure 1. Palmitic acid modulates genes involved in calcium signaling and neurotransmission in enteric neurons.** (A-D) Heatmaps showing transcriptional changes in immortalized enteric neuronal cells (IM-FEN) treated with vehicle (Veh) or palmitic acid (PA, 0.5 mM) for 24 hours (n = 6 per group). Bulk RNA-seq was performed to assess global gene expression changes. (A) Calcium signaling-related genes including ion channels, calcium pumps, and calcium-binding proteins were significantly altered by PA, indicating disrupted intracellular calcium homeostasis. (B) Synaptic transmission-related genes including components of synaptic vesicles and exocytosis machinery were broadly downregulated following PA exposure, suggesting impaired synaptic function. (C) Genes involved in excitatory neurotransmission were reduced in PA-treated cells, consistent with suppression of excitatory signaling pathways. (D) Genes associated with inhibitory neurotransmission showed partial decreased expression, suggesting a broader disruption in the excitatory/inhibitory neuronal balance. Heatmap values represent log<sub>2</sub>-transformed, z-score normalized gene expression. Columns represent individual biological replicates, clustered to illustrate treatment-specific transcriptional signatures.

495  
 496  
 497  
 498  
 499  
 500  
 501  
 502  
 503  
 504

505 **Supplementary Figure 2**

**A** Heat shock proteins regulating cellular stress, motility, and protein homeostasis

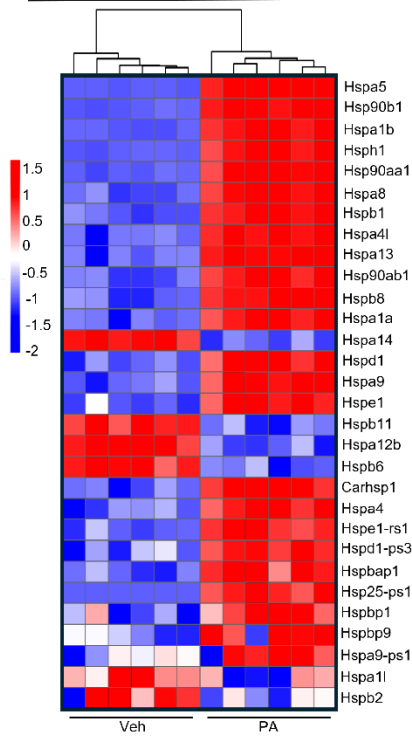

**B** Lipid metabolism and obesity-related markers

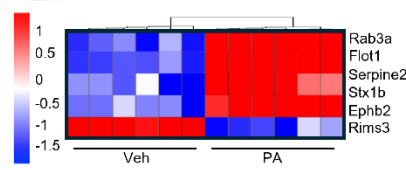

**C** Genes related to inflammatory signaling and regulators of motility

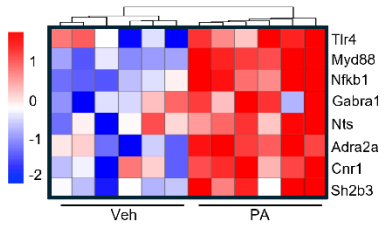

**D** Male body weight (g)

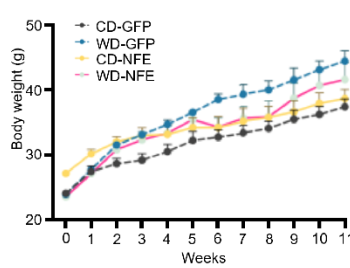

**E** Female body weight (g)

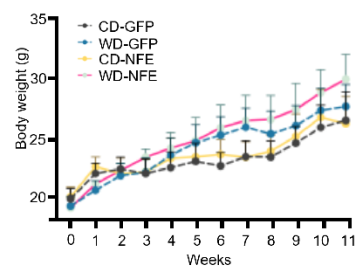

**Supplementary Figure 2. Palmitic acid induces heat shock protein expression in enteric neurons and western diet increases body weight in mice.** (A) Heatmap showing differential expression of heat shock proteins (HSPs) in IM-FEN cells treated with vehicle (Veh) or palmitate (PA, 0.5 mM) for 24 hours (n = 6 per group). Genes include molecular chaperones and protein-folding regulators involved in cellular stress responses. Values are log<sub>2</sub>-transformed, z-score normalized counts. Hierarchical clustering reveals distinct separation between Veh- and PA- treated cells, with robust upregulation of HSPs following PA exposure. (B) Heatmap of lipid metabolism and obesity-related gene expression in IM-FEN cells treated with vehicle (Veh) or palmitic acid (PA, 0.5 mM) for 24 h. (C) Heatmap of inflammatory signaling and neurotransmission-associated motility regulators in the same conditions. (D-E) Body weight measurements of male (D) and female (E) mice over a 12-week period. Mice were fed control diet (CD) or Western diet (WD) and received AAV-eGFP or AAV-Nfe2l2 at week 2. WD-fed animals of both sexes gained significantly more weight over time compared to RD-fed controls, irrespective of AAV treatment. Data are presented as mean ± SEM; n = 4-6 mice per group.

506

507

508

509

510

511

512

513

514

515

516 **Supplementary Figure 3**

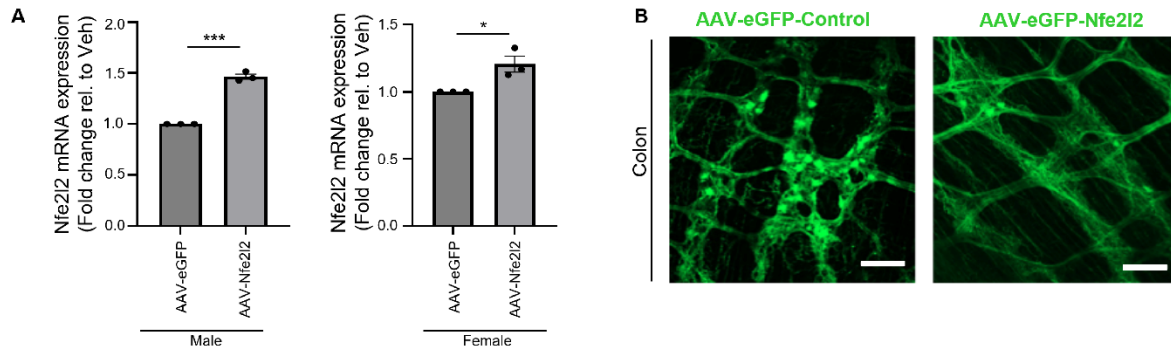

**Supplementary Figure 3. AAV-mediated overexpression of Nfe2l2 enhances neuronal Nfe2l2 expression in the colon.** A) Quantitative RT-PCR analysis showing increased colonic Nfe2l2 mRNA expression in AAV-Nfe2l2-treated mice compared to AAV-eGFP controls. Data represent technical triplicates from male and female samples and confirm successful AAV overexpression. Data represent mean  $\pm$  SEM. Statistical analysis was performed using t-test. \* $P < 0.05$ ; \*\*\* $P < 0.001$ ; B) Representative whole-mount confocal images of the myenteric plexus displaying eGFP fluorescence in mice treated with AAV-eGFP (Control) or AAV-Nfe2l2. Images confirm effective viral transduction across the enteric neuronal network. Scale bar, 50  $\mu$ m.

517  
 518  
 519  
 520  
 521  
 522  
 523  
 524  
 525  
 526

527 **Supplementary Figure 4**

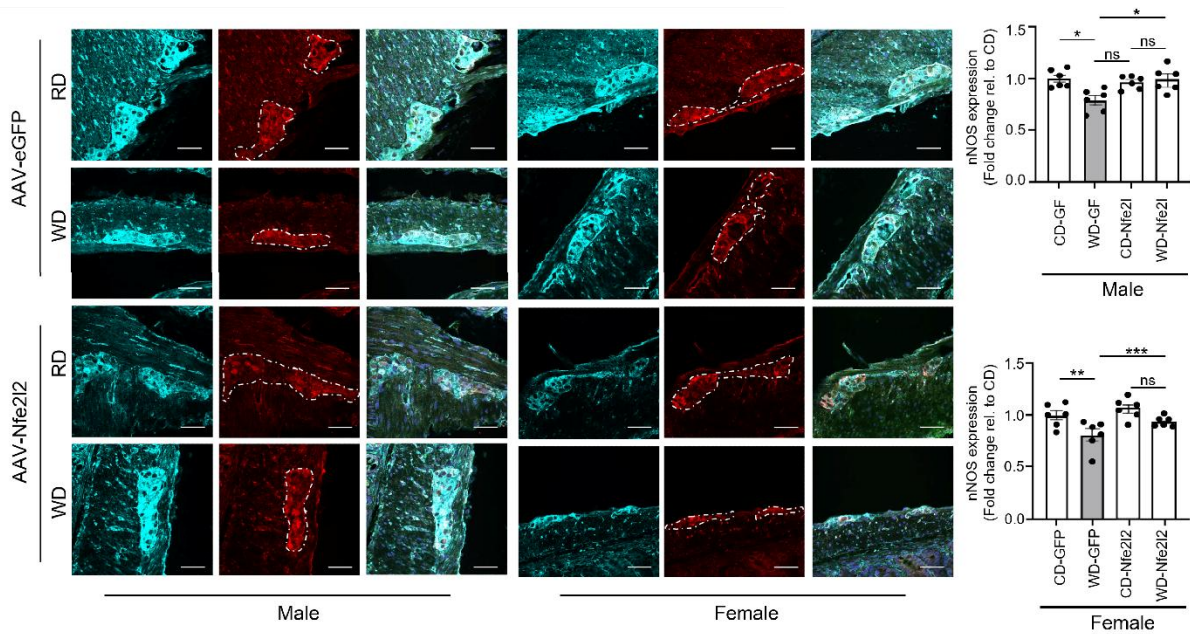

**Supplementary Figure 4. AAV-Nfe2l2 preserves neuronal nitric oxide synthase (nNOS) expression in the colonic myenteric plexus of Western diet-fed mice.** Representative immunofluorescence images of colon tissue sections from male and female mice fed control diet (CD) or Western diet (WD) for 12 weeks and treated with AAV-eGFP or AAV-Nfe2l2. Sections were co-stained for the pan-neuronal marker TUBB3 (cyan) and neuronal nitric oxide synthase (nNOS, red). Merged images highlight co-localization of nNOS within TUBB3+ neurons. AAV-Nfe2l2 administration preserved nNOS expression in WD-fed mice compared to AAV-eGFP controls. Quantification of the proportion of nNOS+ neurons among total TUBB3+ neurons across groups. A total of 28 mice were used: n = 4 mice per group for CD and WD AAV-eGFP, and n = 3 mice per group for CD and WD AAV-Nfe2l2. From each mouse, 6-10 randomly selected myenteric ganglia were imaged and analyzed. Data represent mean  $\pm$  SEM. Statistical analysis was performed using two-way ANOVA. \*P < 0.05; \*\*P < 0.01; \*\*\*P < 0.001; ns, not significant. Scale bars, 50  $\mu$ m.

528

529

530

531

532

533

534

535

536

537

538 **Supplementary Figure 5**

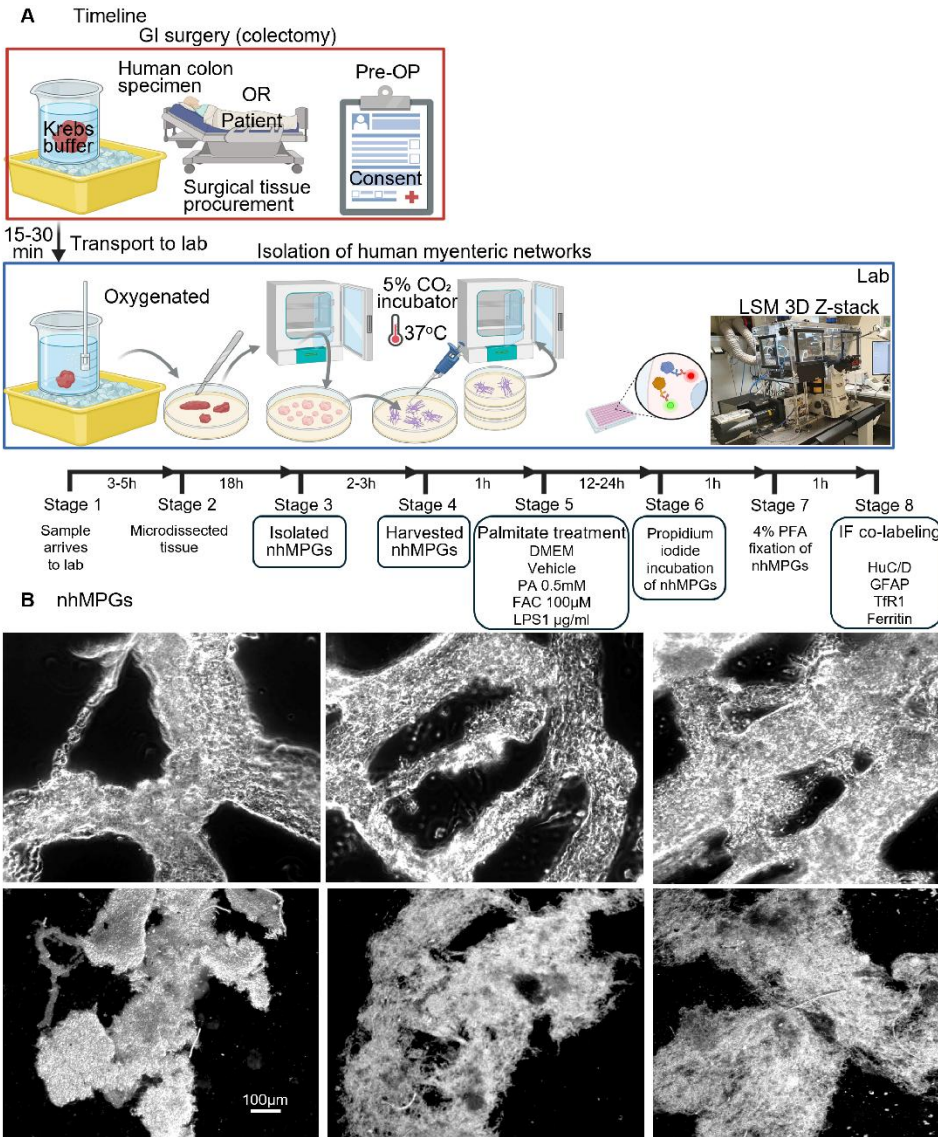

**Supplementary Figure 5. Logistics and timeline for procurement of human colon surgical specimens, isolation of human networks of ganglia and in vitro experiments with palmitic acid.** (A) Schematic showing the timeline from patient consent to isolation of nhMPG networks and palmitic acid induction experiments. (B) Examples of nhMPG networks obtained after colectomy in human patients are shown with transmitted light imaging.

539  
540  
541  
542  
543  
544  
545  
546  
547  
548

549 **Supplementary Figure 6**

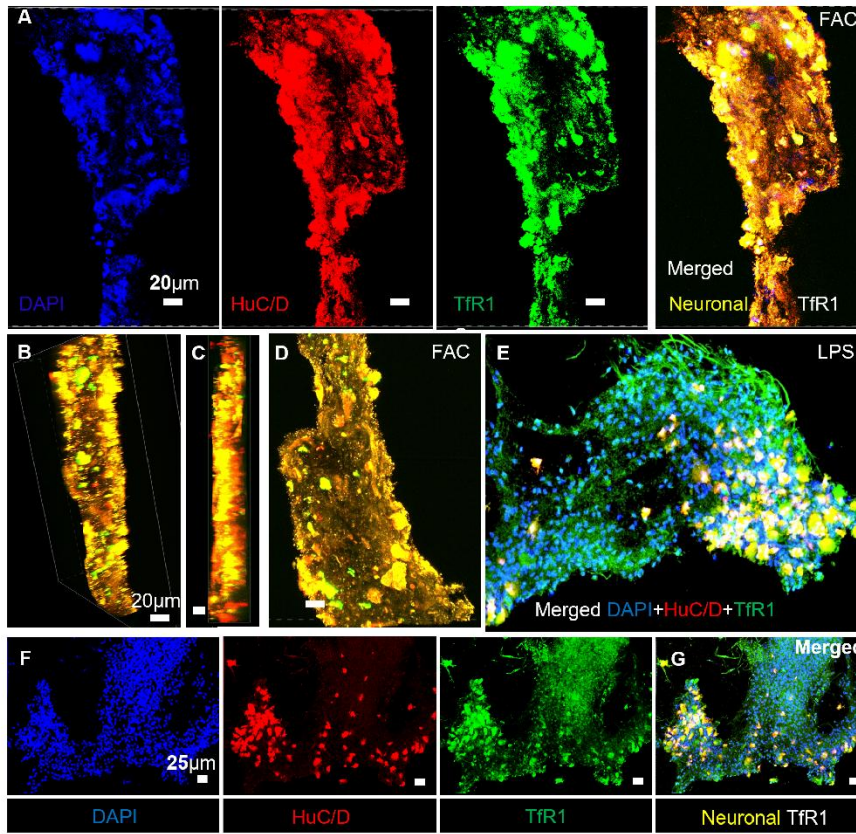

**Supplementary Figure 6. Differential induction of neuronal and non-neuronal Tfr1 expression by PA, FAC, and LPS in human nhMPG networks.** (A-E) Representative confocal images of myenteric ganglia (nhMPG) treated with ferric ammonium citrate (FAC, 100  $\mu$ M) or lipopolysaccharide (LPS, 1  $\mu$ g/mL) for 24 h. Sections were stained for DAPI (blue), the pan-neuronal marker HuC/D (red), and transferrin receptor 1 (Tfr1, green). Merged images show co-localization of neuronal Tfr1 (yellow). Representative confocal images of FAC-treatment, shown as z-stack projections from different fields of view, increased neuronal Tfr1 expression (A-D), while LPS also induced Tfr1 expression in enteric neurons (E). (F-G) Additional examples of LPS-treated ganglia showing broad upregulation of Tfr1 in both neuronal and non-neuronal regions. (H-K) Quantification of Tfr1 expression across conditions. (H) Neuronal Tfr1 expression/field was significantly increased by PA (0.5 mM) and LPS (1  $\mu$ g/mL) to a similar extent, while FAC induced a markedly greater increase. (I) FAC induced neuronal Tfr1 expression in a significantly larger number of HuC/D<sup>+</sup> neurons per field compared to PA. (J) In contrast, non-neuronal Tfr1 expression was significantly greater with PA than with FAC, based on both total area and number of distinct Tfr1-positive regions per field. (K) Pixel intensity analysis revealed that FAC resulted in marginally but significantly higher Tfr1 intensity than PA. All data were analyzed by one-way ANOVA followed by Tukey's post hoc test. Values represent mean  $\pm$  SEM. \*P < 0.05, \*\*P < 0.01, \*\*\*P < 0.001. Quantification of Tfr1 expression was performed using Nikon NIS-Elements co-localization module from 18  $\mu$ m-thick z-stacks acquired at 0.5  $\mu$ m intervals.

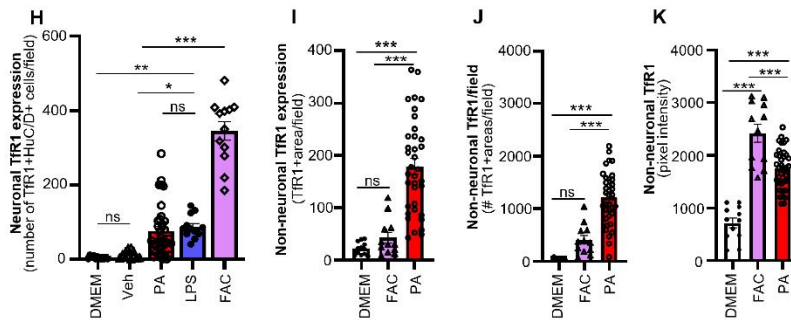

550  
551  
552  
553  
554  
555  
556  
557  
558  
559

560 **Supplementary Figure 7**

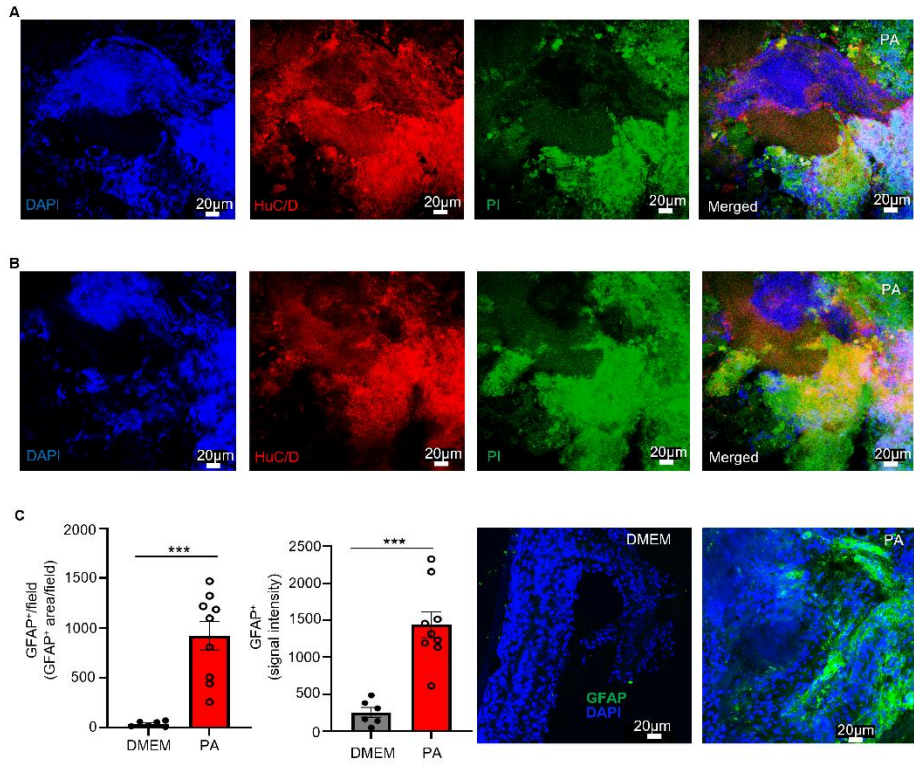

**Supplementary Figure 7. Palmitic acid disrupts ganglionic morphology and induces glial activation in human nhMPG networks.** (A-B) Representative confocal images showing structural abnormalities in human myenteric ganglia (nhMPG) following PA (0.5 mM, 24 h) treatment. Distortion or fragmentation of the ganglionic network was observed in a subset of patient samples. (C) PA treatment induced glial fibrillary acidic protein (GFAP) expression in HuC/D glial cells within the nhMPG, consistent with reactive gliosis. GFAP is not typically detected in healthy human enteric glia. Quantification was performed in ganglionic networks from a representative patient (n = 9 networks per condition). Values are expressed as mean ± SEM. \*P < 0.05, \*\*P < 0.01, \*\*\*P < 0.001.

561  
 562  
 563  
 564  
 565  
 566  
 567  
 568  
 569  
 570

571 **Supplementary Figure 8**

572

573

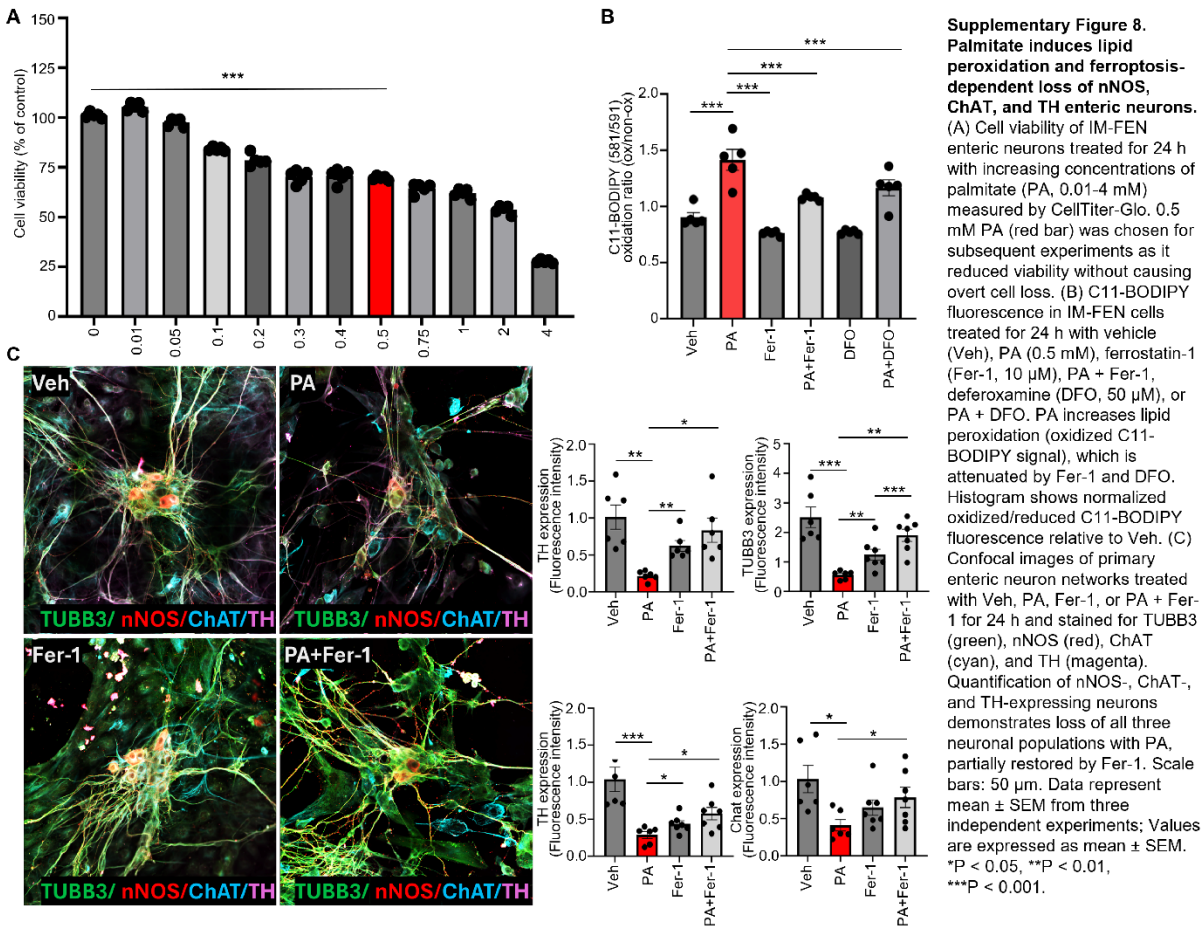

574

575

576

577

578

579

580

581

582 **Supplementary Figure 9**

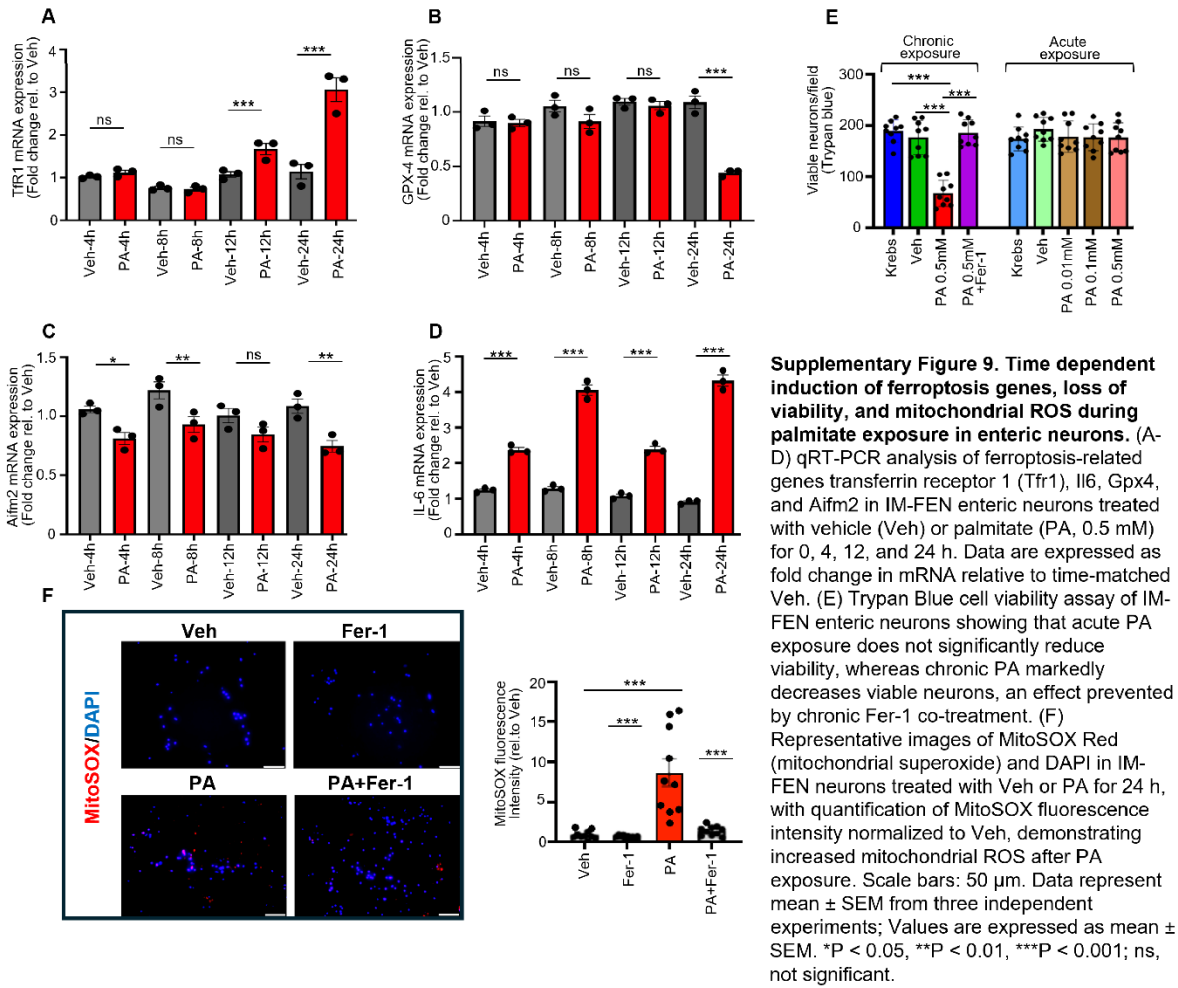

**Supplementary Figure 9. Time dependent induction of ferroptosis genes, loss of viability, and mitochondrial ROS during palmitate exposure in enteric neurons.** (A-D) qRT-PCR analysis of ferroptosis-related genes transferrin receptor 1 (Tfr1), Il6, Gpx4, and Aifm2 in IM-FEN enteric neurons treated with vehicle (Veh) or palmitate (PA, 0.5 mM) for 0, 4, 12, and 24 h. Data are expressed as fold change in mRNA relative to time-matched Veh. (E) Trypan Blue cell viability assay of IM-FEN enteric neurons showing that acute PA exposure does not significantly reduce viability, whereas chronic PA markedly decreases viable neurons, an effect prevented by chronic Fer-1 co-treatment. (F) Representative images of MitoSOX Red (mitochondrial superoxide) and DAPI in IM-FEN neurons treated with Veh or PA for 24 h, with quantification of MitoSOX fluorescence intensity normalized to Veh, demonstrating increased mitochondrial ROS after PA exposure. Scale bars: 50  $\mu$ m. Data represent mean  $\pm$  SEM from three independent experiments; Values are expressed as mean  $\pm$  SEM. \*P < 0.05, \*\*P < 0.01, \*\*\*P < 0.001; ns, not significant.

583  
584  
585  
586  
587  
588  
589  
590  
591  
592

593 **Supplementary Figure 10**

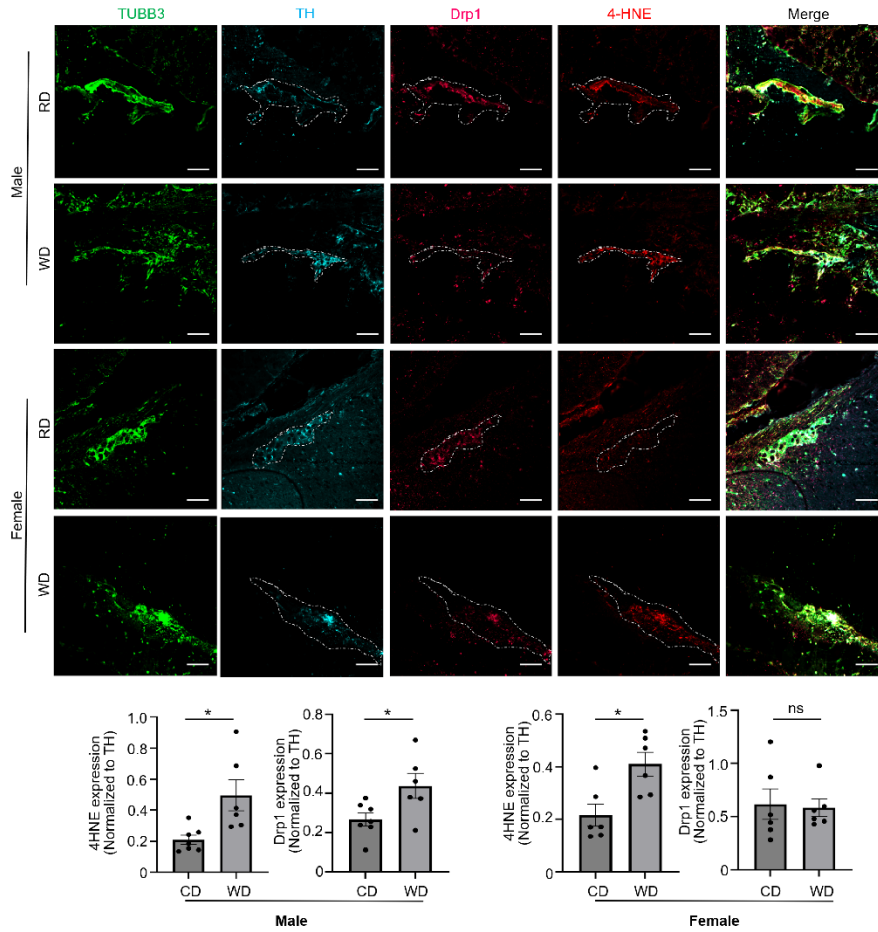

594

595

596

597

598

599

600

601

602

603

604 **Supplementary Figure 11**

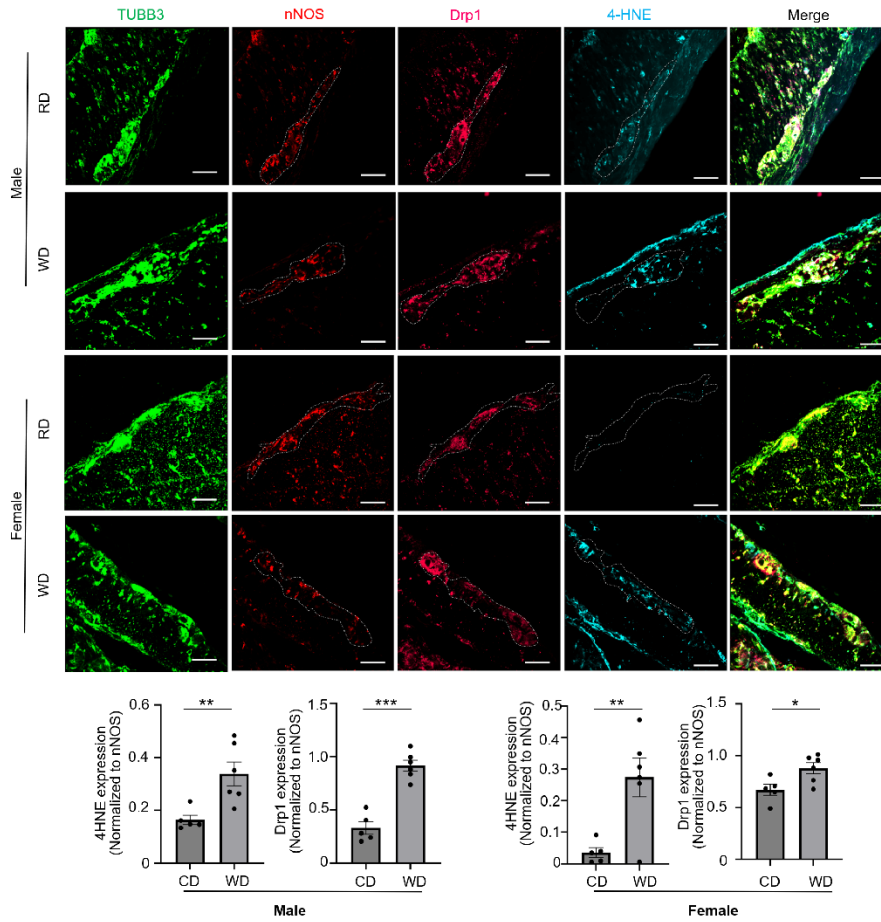

**Supplementary Figure 11. Western diet increases Drp1 and 4-HNE in nNOS-positive myenteric neurons in vivo.** Representative confocal images of distal colon myenteric plexus from mice fed control diet (CD) or Western diet (WD) for 12 weeks, stained for the pan-neuronal marker TUBB3 (green), neuronal nitric oxide synthase (nNOS, red), the mitochondrial fission protein Drp1 (magenta), and the lipid peroxidation marker 4-HNE (cyan). Dashed lines outline nNOS-positive neuronal cell bodies and processes. Merged images show increased Drp1 and 4-HNE signal within nNOS-positive neurons in Western diet exposed mice compared with controls, mapping mitochondrial stress and lipid peroxidation in this nitrergic subset. Bar graphs quantify nNOS-positive neuron density and Drp1 and 4-HNE fluorescence intensity within nNOS-positive neurons. Scale bars: 20  $\mu$ m. Data represent mean  $\pm$  SEM from n = 4 mice per group; Data represent mean  $\pm$  SEM from three independent experiments; Values are expressed as mean  $\pm$  SEM. \*P < 0.05, \*\*P < 0.01, \*\*\*P < 0.001.

605  
 606  
 607  
 608  
 609  
 610  
 611  
 612  
 613  
 614

615 **Supplementary Figure 12**

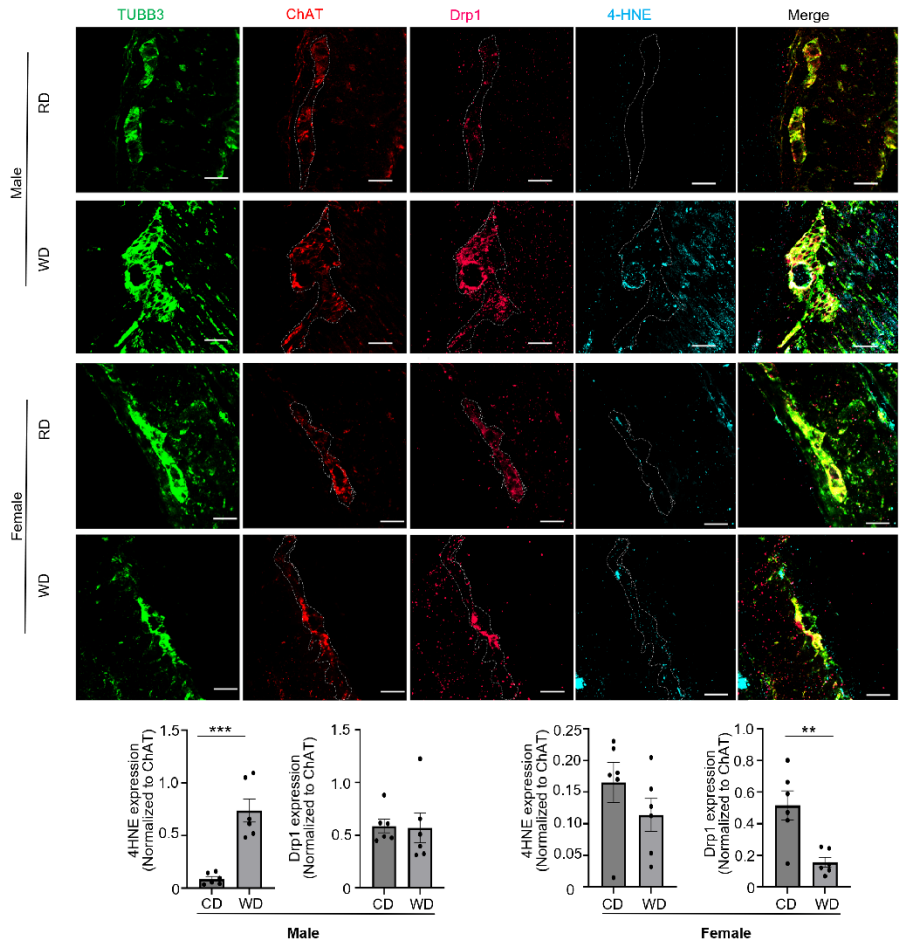

**Supplementary Figure 12. Western diet alters Drp1 and 4-HNE in ChAT-positive myenteric neurons in a sex-dependent manner.** Representative confocal images of distal colon myenteric plexus from mice fed control diet (CD) or Western diet (WD) for 12 weeks, stained for the pan-neuronal marker TUBB3 (green), choline acetyltransferase (ChAT, red), the mitochondrial fission protein Drp1 (magenta), and the lipid peroxidation marker 4-HNE (cyan). Dashed lines outline ChAT-positive neuronal cell bodies and processes. Merged images show increased 4-HNE signal within ChAT-positive neurons in Western diet exposed mice compared with controls, consistent with enhanced lipid peroxidation. Quantification demonstrates that Drp1 intensity within ChAT-positive neurons is unchanged in males and reduced in females, whereas ChAT-positive neuron density in females is not significantly altered. Scale bars: 20  $\mu$ m. Data represent mean  $\pm$  SEM from three independent experiments; Values are expressed as mean  $\pm$  SEM. \*P < 0.05, \*\*P < 0.01, \*\*\*P < 0.001.

616  
 617  
 618  
 619  
 620  
 621  
 622  
 623  
 624  
 625

626 **Supplementary Figure 13**

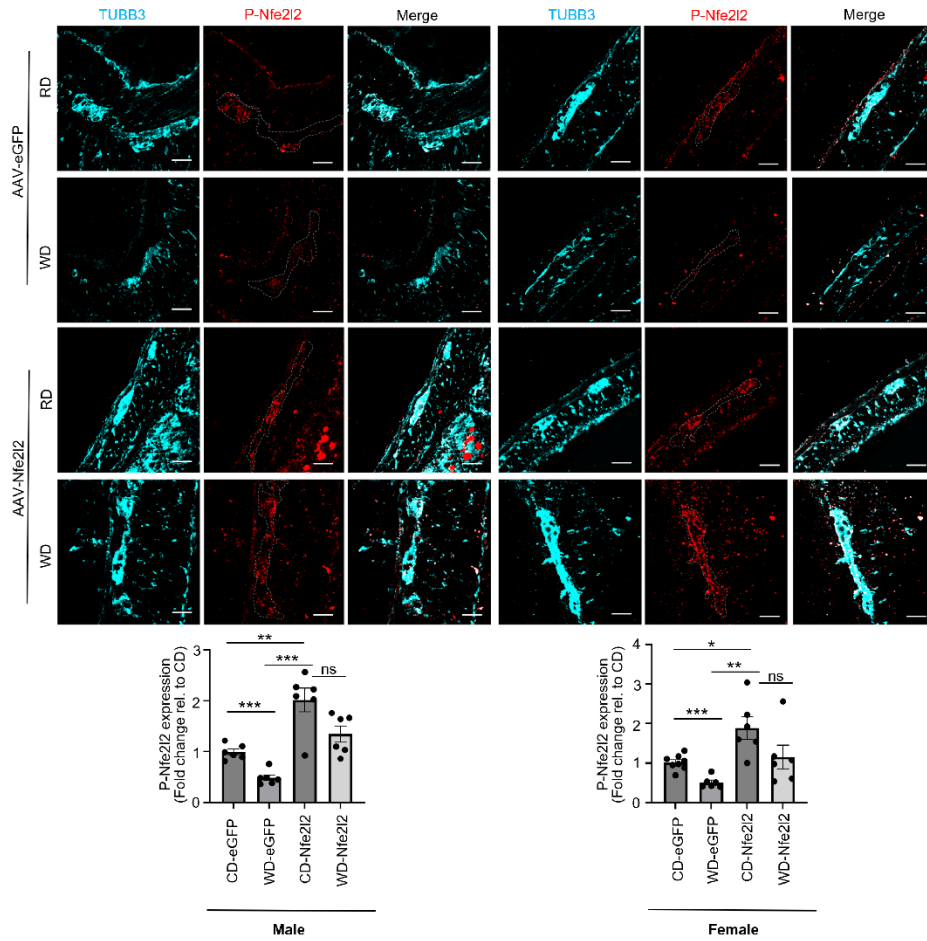

**Supplementary Figure 13. Western diet suppresses phospho-Nfe2l2 in myenteric neurons and AAV Nfe2l2 restores antioxidant signaling.** Immunofluorescence staining of distal colon sections from male and female mice fed control diet or Western diet and treated with AAV-eGFP or AAV-Nfe2l2, co-stained for TUBB3 (cyan) and phospho Nfe2l2 (P-Nfe2l2, red). Merged images show reduced neuronal P Nfe2l2 signal in Western diet AAV eGFP groups and enhanced P-Nfe2l2 expression within TUBB3<sup>+</sup> neurons in Western diet AAV Nfe2l2 treated mice. Histograms show fold change in TUBB3<sup>+</sup> neuron density and P-Nfe2l2 fluorescence intensity within TUBB3<sup>+</sup> neurons, normalized to the control diet AAV eGFP group. Scale bars: 50  $\mu$ m. Data represent mean  $\pm$  SEM from n = 3-4 mice per group. Statistical analysis was performed using two-way ANOVA. \*P < 0.05; \*\*P < 0.01; \*\*\*P < 0.001; ns, not significant.

627  
628  
629  
630  
631  
632  
633  
634  
635  
636

637 **Supplementary Figure 14**

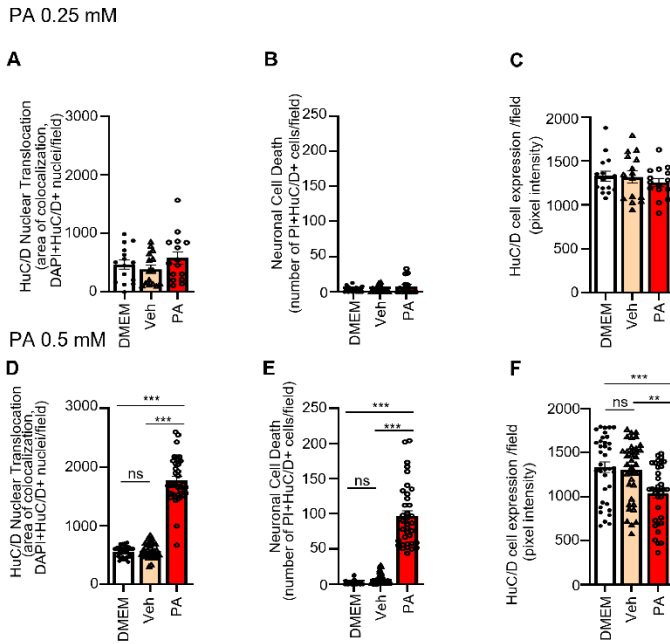

**Supplementary Figure 14. Concentration-dependent effect of palmitic acid on induction of neuronal cell death in nhMPG networks.**

Networks of human myenteric ganglia (nhMPG) isolated from GI surgical specimens were exposed in vitro to vehicle (Veh, DMEM, 0.25mM or 0.5mM PA concentration for 24h). PA 0.25mM consistently mirrored vehicle responses and therefore did not trigger ferroptotic injury. PA had no effect on (A) HuC/D nuclear translocation (stress response in neurons), (B) neuronal cell death, PI nuclear staining) and (C) HuC/D cell expression. (D-F) In contrast, PA 0.5mM elicited robust cell-death and stress-response signals. Statistical comparisons were performed by one-way ANOVA followed by Tukey's post hoc test. Data are presented as mean  $\pm$  SEM; \*P < 0.05, \*\*P < 0.01, \*\*\*P < 0.001; ns, not significant. Quantification of cell death and HuC/D translocation was conducted using Nikon NIS-Elements colocalization tools in 18- $\mu$ m confocal z-stacks acquired at 0.5- $\mu$ m intervals. A total of 36 ganglionic networks per treatment group were analyzed. Human colonic tissue was obtained from 3 human subjects for each treatment, with 12 z-stacks from distinct nhMPG networks per human subject used for all colocalization and statistical analyses.

638

639

640

641

642

643

644

645

646

647

648 **Supplementary Figure 15**

PA 0.25 mM

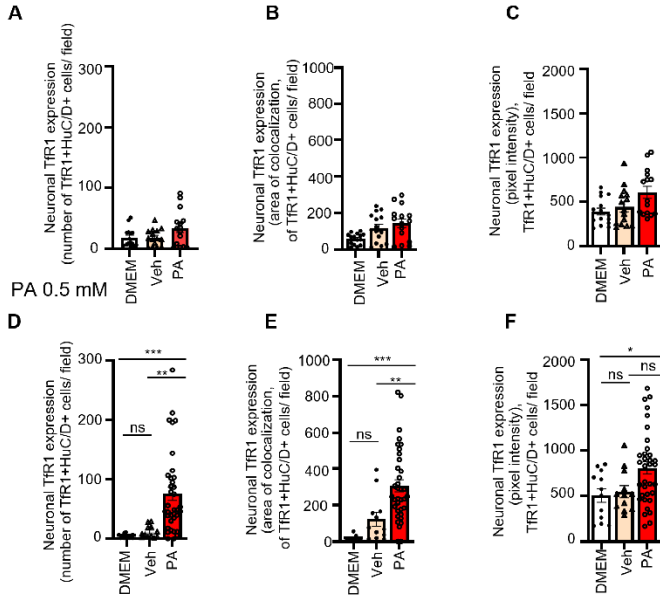

**Supplementary Figure 15. Concentration-dependent increase in neuronal Tfr1 activation by palmitic acid (PA) in nhMPG networks.** The effect of palmitic acid was restricted to 0.5mM concentration. A lower concentration of 0.25mM had no effect on Tfr1 activation. Networks of human myenteric ganglia (nhMPG) isolated from colectomy specimens were exposed ex vivo to Veh, DMEM, PA 0.25mM or PA 0.5mM. PA (0.25mM) did not increase Tfr1 expression in (A) the number of HuC/D+Tfr1+ neurons, (B) Tfr1+ area of colocalization with HuC/D+, and (C) the pixel intensity of neuronal Tfr1 immunoreactivity. In contrast, PA 0.5mM produced consistent evidence of ferroptotic signaling, with (D) significant increases in HuC/D+Tfr1+ neuronal counts, (E) Tfr1+ area per neuron and (F) neuronal Tfr1 fluorescence intensity. Statistical comparisons were performed using one-way ANOVA followed by Tukey's post hoc test. Data are reported as mean ± SEM; \*P < 0.05, \*\*P < 0.01, \*\*\*P < 0.001; ns, not significant. Quantification of Tfr1 expression was performed using Nikon NIS-Elements colocalization tools in 18-µm confocal z-stacks collected at 0.5-µm optical intervals. A total of 36 ganglionic networks per treatment group were analyzed. Human colonic tissue was obtained from 3 GI surgical cases, with 12 z-stacks from distinct nhMPG networks per human subject included in colocalization and statistical analyses.

649  
650  
651  
652  
653  
654  
655  
656  
657  
658

659 **Supplementary Figure 16**

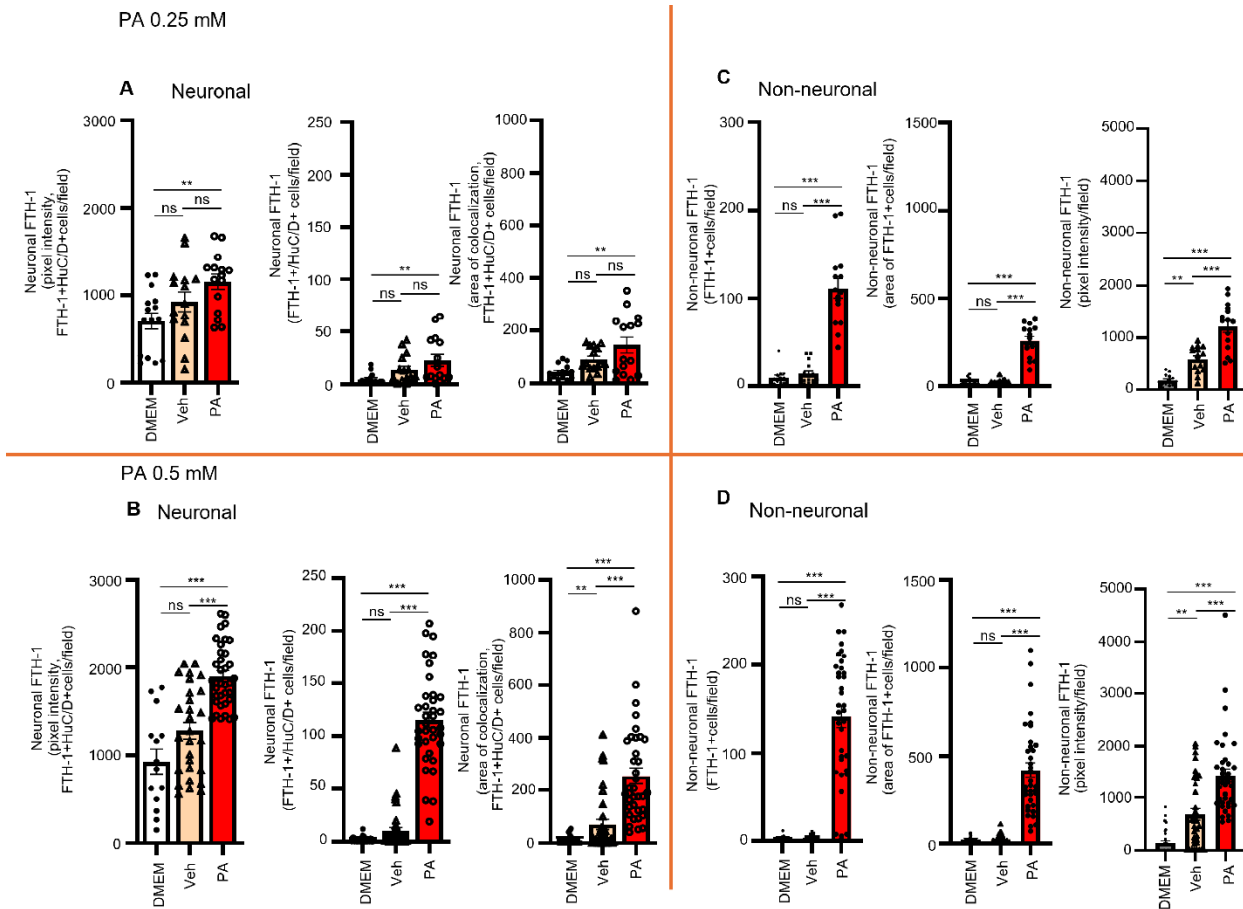

**Supplementary Figure 16. Concentration-dependent Ferritin (FTH-1) ferroptotic responses to palmitic acid in human myenteric ganglia, with neuronal susceptibility occurring mainly at 0.5mM PA.** Networks of human myenteric ganglia (nhMPG) isolated from colectomy specimens were treated in vitro with vehicle, DMEM, PA 0.25mM or PA 0.5mM concentration. Ferritin (FTH-1) activation in neuronal (HuC/D<sup>+</sup>) and non-neuronal (HuC/D<sup>-</sup>) cell populations was analyzed for complementary quantitative parameters. (A) PA 0.25mM did not increase neuronal Ferritin in nhMPG networks compared to Veh, whereas upregulation occurred in comparison to the DMEM group. (B) In contrast, PA 0.5mM triggered a ferroptotic response, with significant increases in Ferritin (FTH-1) pixel intensity in HuC/D<sup>+</sup> neurons, number of Ferritin<sup>+</sup>HuC/D<sup>+</sup> neurons, and Ferritin-HuC/D colocalized area, all reflecting robust neuronal FTH-1 upregulation. (C, D) In non-neuronal cells, PA 0.25mM or PA 0.5mM both elicited ferroptotic changes in comparison to Veh across all metrics: number of Ferritin<sup>+</sup> non-neuronal cells, non-neuronal area, and pixel intensity in non-neuronal Ferritin<sup>+</sup> cells. Statistical comparisons were performed by one-way ANOVA followed by Tukey's post hoc test. Values are presented as mean ± SEM; \*P<0.05, \*\*P < 0.01, \*\*\*P < 0.001; ns, not significant. Quantification of Ferritin expression and colocalization was performed using Nikon NIS-Elements on 18-µm confocal z-stacks acquired at 0.5-µm optical intervals. Thirty-six ganglionic networks per treatment group were analyzed. Colonic tissue was collected from 3 human donors, with 12 z-stacks from distinct nhMPG networks per human subject specimen included in all analyses.

660

661

662
